1 **Experimental adaptation of dengue virus 1 to *Aedes albopictus***  
2 **mosquitoes by *in vivo* selection**

3

4 Rachel Bellone<sup>1,2,£</sup>, Sebastian Lequime,<sup>2,3,4,£</sup> Henri Jupille,<sup>1,£</sup> Giel P. Göertz,<sup>5</sup> Fabien Aubry,<sup>3</sup>  
5 Laurence Mousson,<sup>1</sup> Géraldine Piorkowski,<sup>6,7</sup> Pei-Shi Yen,<sup>1</sup> Gaëlle Gabiane,<sup>1</sup> Marie  
6 Vazeille,<sup>1</sup> Anavaj Sakuntabhai,<sup>8</sup> Gorben P. Pijlman,<sup>5</sup> Xavier de Lamballerie,<sup>6,7</sup> Louis  
7 Lambrechts,<sup>3,#</sup> Anna-Bella Failloux<sup>1,#,\*</sup>

8 <sup>1</sup>Department of Virology, Institut Pasteur, Arboviruses and Insect Vectors Unit, Paris, France;

9 <sup>2</sup>Sorbonne Université, Collège Doctoral, F75005 Paris, France ; <sup>3</sup>Department of Virology,

10 Institut Pasteur, Insect-Virus Interactions Unit, CNRS UMR2000, Paris, France; <sup>4</sup>Department

11 of Microbiology and Immunology, Rega Institute, KU Leuven-University of Leuven, Leuven,

12 Belgium; <sup>5</sup>Laboratory of Virology, Wageningen University, Wageningen, The Netherlands;

13 <sup>6</sup>Aix Marseille University, IRD French Institute of Research for Development, EHESP French

14 School of Public Health, EPV UMR\_D 190 'Emergence des Pathologies Virales', Marseille,

15 France; <sup>7</sup>IHU Méditerranée Infection, APHM Public Hospitals of Marseille, Marseille,

16 France; <sup>8</sup>Department of Global Health, Institut Pasteur, Functional Genetics of Infectious

17 Diseases Unit, Paris, France.

18 <sup>£</sup>These authors contributed equally to this work.

19 <sup>#</sup>These authors contributed equally to this work.

20 <sup>\*</sup>Correspondence: [anna-bella.failloux@pasteur.fr](mailto:anna-bella.failloux@pasteur.fr)

21

22 **Abstract**

23 In most of the world, Dengue virus (DENV) is mainly transmitted by the mosquito *Aedes*  
24 *aegypti* while in Europe, *Aedes albopictus* is responsible for human DENV cases since 2010.  
25 Identifying mutations that make DENV more competent for transmission by *Ae. albopictus*  
26 will help to predict emergence of epidemic strains. Ten serial passages *in vivo* in *Ae.*  
27 *albopictus* led to select DENV-1 strains with greater infectivity for this vector *in vivo* and in  
28 cultured mosquito cells. These changes were mediated by multiple adaptive mutations in the  
29 virus genome, including a mutation at position 10,418 in the DENV 3'UTR within an RNA  
30 stem-loop structure involved in subgenomic flavivirus RNA (sfRNA) production. Using  
31 reverse genetics, we showed that the 10,418 mutation alone does not confer a detectable  
32 increase in transmission efficiency *in vivo*. These results reveal the complex adaptive  
33 landscape of DENV transmission by mosquitoes and emphasize the role of epistasis in  
34 shaping evolutionary trajectories of DENV variants.

35

36 **Keywords:** Vector-borne diseases, Europe, Emergence, Invasive species, Dengue, *Ae.*  
37 *albopictus*, adaptive-evolution, sfRNA

38

39

## 40 **Introduction**

41 Vector-borne diseases represent almost one fourth of all emerging infectious diseases  
42 worldwide (1). Among the emerging diseases, arboviruses occupy the top stair with several  
43 million human cases reported annually (2). Dengue virus (DENV) belongs to the *Flavivirus*  
44 genus of the *Flaviviridae* family and is by far the most important arboviral disease, with the  
45 number of human dengue infection cases exceeding 300 million annually; 96 million are  
46 symptomatic dengue fever/hemorrhagic fever leading to an estimated 22,000 human deaths  
47 (3). DENV is comprised of four antigenically distinct but genetically related serotypes  
48 referred to as DENV1-4 (4). Clinical manifestations range from mild cases of dengue fever to  
49 severe cases of dengue hemorrhagic fever and/or dengue shock syndrome. All four DENV  
50 serotypes are now circulating in Asia, Africa and America (5). In past centuries, dengue was  
51 not an uncommon disease in Europe: the last record of a dengue outbreak in the 20<sup>th</sup> century  
52 was in Athens, Greece, in 1927–1928 (6). This outbreak was unusual by the number of cases  
53 (~1 million) and the importance of severe clinical symptoms (e.g. hemorrhagic  
54 manifestations) leading to deaths (~1,000). After this Greek episode, dengue disappeared  
55 from Europe (7) as the mosquito *Aedes aegypti* disappeared from Eastern Mediterranean after  
56 1935 through improving sanitation and mosquito control measures (8). No local transmission  
57 of DENV has been reported in Europe until 2010, when clusters of autochthonous cases were  
58 reported in Southern France (9) and Croatia (10). In France, several transmission episodes  
59 were successively reported: 2013-2015 (11-13), 2018-2019 (14, 15). The vector was *Aedes*  
60 *albopictus*, first detected in Europe in 1979 in Albania (16), then in 1990 in Italy (17), and  
61 today, established in more than 20 European countries (18). Unexpectedly, *Ae. albopictus*  
62 from France was shown to be more competent to experimentally transmit DENV-1 strains  
63 compared to its counterpart *Ae. aegypti* from the French West Indies (19). Contrary to *Ae.*  
64 *aegypti*, the mosquito *Ae. albopictus* which is native to South-East Asia, has a broader range  
65 of hosts (20). When *Ae. aegypti* is absent, *Ae. albopictus* can be responsible for DENV

66 epidemics, as shown for the outbreaks in the Seychelles islands (21), Japan (22), La Réunion  
67 Island (23), and Hawaii (24). However, to date, *Ae. albopictus* is considered a minor vector of  
68 DENV relative to *Ae. aegypti* (25).

69 DENV serotypes have caused recent epidemics by changing their host ranges to  
70 increase infections in humans (26). As most arboviruses, DENV is capable of rapidly  
71 adapting to changes in their environment (or novel hosts) due to the accumulation of one or  
72 more specific mutations in the viral genome. For DENV, mutations in the 3' untranslated  
73 region (UTR) have previously been linked to increased epidemiological fitness of the virus  
74 via a mechanism involving increased expression of 3' UTR-derived subgenomic flavivirus  
75 RNA (sflRNA) expression (27). SflRNA is a known determinant for mosquito transmission of  
76 multiple flaviviruses like DENV, Zika virus and West Nile virus (28-32). Nucleotide  
77 substitutions in the 3'UTR reducing or ablating sflRNA expression negatively impact viral  
78 infection and transmission rates, suggesting that there is evolutionary pressure on  
79 conservation of RNA structures that dictate sflRNA expression in mosquitoes (33, 34). These  
80 studies indicate that subtle changes in the viral nucleotide composition can enhance the viral  
81 epidemic potential. On the same line, CHIKV has acquired the ability to spread globally  
82 owing to a single *Ae. albopictus*-adaptive mutation E1-226V (35). This mutation increased the  
83 infectivity of CHIKV in *Ae. albopictus* (36, 37).

84 We hypothesize that DENV can be selected for enhanced transmission by European *Ae.*  
85 *albopictus*, which would provide insight into future epidemic DENV strains that could pose a  
86 threat to human health. We conducted an experimental evolution study to identify nucleotide  
87 changes in the DENV genome by serially passaging DENV-1 isolates from Thailand (30A)  
88 and France (1806) in an *Ae. albopictus* population from Nice, France. Ten total passages were  
89 completed after which viral isolates were deep sequenced to identify newly acquired  
90 mutations. Importantly, we investigated whether the adaptation to the mosquito vector  
91 resulted in enhanced transmission potential or replication rate in mosquitoes. These results

92 exemplify the potential of virus-adaptation studies for the identification of DENV strains  
93 likely to emerge.

94

## 95 **Results**

### 96 **European *Ae. albopictus* are differentially susceptible to DENV-1.**

97 Arboviral transmission requires competent mosquitoes. To test whether European populations  
98 of *Ae. albopictus* can sustain local transmission of DENV-1, as reported in France (9) and  
99 Croatia (10), *Ae. albopictus* mosquitoes from Alessandria and Genoa (Italy), Cornelia and  
100 Martorell (Spain), Nice and Saint-Raphael (France) were experimentally infected with  
101 DENV-1 1806 from France or with DENV-1 30A from Thailand. Only engorged females  
102 were kept for analysis (samples size indicated in Fig. 1). When examining viral infection rate  
103 (Fig. 1a) and dissemination efficiency (Fig. 1b) at 14 and 21 days post-infection (dpi),  
104 percentages increased along with the dpi for the majority of virus/mosquito combinations.  
105 Within a mosquito population, the viral strain did not play a major role in either infection rate  
106 or dissemination efficiency (Fisher's exact test:  $p > 0.05$  after Bonferroni correction; Table  
107 S1). In contrast, we observed significant differences between mosquito populations (Fisher's  
108 exact test:  $p < 0.05$ ; Table S2) meaning that the geographic origin of the mosquito population  
109 is a critical factor that determines the outcome of viral infection and dissemination. Viral  
110 loads in heads (indicative of a successful dissemination from the midgut) did not mostly differ  
111 among mosquitoes having disseminated the virus (Fig. 1c, Table S3) (Wilcoxon Rank-Sum  
112 test:  $p > 0.05$ ). No viral particles were detected in mosquito saliva (data not shown).

113

### 114 **Experimental adaptation of DENV-1 to *Ae. albopictus*.**

115 To examine whether DENV-1 can adapt to *Ae. albopictus*, DENV-1 1806 and DENV-1 30A  
116 were passaged 10 times in duplicate in *Ae. albopictus* mosquitoes from Nice, France (Fig. 2).  
117 Viral titers of cell culture supernatants collected at each passage fluctuated slightly from

118 passages 1 to 10 (Fig. S1). Additionally, the viruses were passaged 10 times in duplicate in  
119 *Ae. albopictus* C6/36 cells as a cell culture control. Full viral genomes were examined by  
120 deep sequencing at each passage (1-10) for the two replicates (R1 and R2) of *in vivo* mosquito  
121 infections and for passages 0 (parental strain), 1, 5 and 10 for the C6/36 cell culture control.

122 The two parental DENV-1 strains, 1806 and 30A, yielded a mean sequencing depth of  
123 68,687X (1806) and 133,941X (30A), covering 99.97% and 100% of the reference genome at  
124 >100X. With the exception of 30A (passage 4, R2 in mosquitoes; covering only 34.62% of  
125 the reference genome at >100X), all passages had a mean coverage between 995X and  
126 211,830X, paving between 100 and 99.25% of the reference genome at >100X (Fig. S2).

127 No major changes in single nucleotide variants (SNV) frequencies were detected when  
128 DENV-1 isolate was serially passaged on C6/36 cells (Fig. 3a). Remarkably, we did not  
129 detect a single mutation that reached consensus level (frequency >50%) in the C6/36 control  
130 passages. In contrast, when DENV-1 1806 or 30A was passaged in *Ae. albopictus*  
131 mosquitoes, consensus level variants were detected as soon as passages 2 (DENV-1 1806) and  
132 5 (DENV-1 30A), and a total of 30 consensus level variants were detected at passage 10 (Fig.  
133 3a, Table S4). In total, twenty consensus level SNVs were detected in DENV-1 30A  
134 (positions 448, 694, 1611, 1768, 1959, 2002, 2200, 2716, 2977, 3442, 5822, 6658, 6728,  
135 7267, 7952, 8149, 8485, 9504, 10208, 10258) and 10 in DENV-1 1806 (positions 1840, 2719,  
136 3001, 3757, 4552, 4606, 5667, 7360, 9067, 10418). Out of the 30 consensus variants, 23  
137 synonymous changes, 6 non-synonymous and one variant located in the 3'UTR were detected  
138 (Fig. 3b). The variant located at position 10,418 in the 3'UTR was the only SNV shared  
139 between the replicates R1 and R2 of DENV-1 1806. Its frequency increased over the  
140 passages, reaching consensus level at passage 4 for replicate 1 and passage 8 for replicate 2  
141 (Fig. 3a). The variant became almost fixed (frequency > 99%) at passage 5 for replicate 1 and  
142 passage 10 in replicate 2. No SNV was common to the two replicates for DENV-1 30A.  
143 These results indicate that DENV-1 accumulates mutations during passaging in *Ae. albopictus*

144 that likely facilitate virus replication in the mosquito or virus dissemination into the saliva to  
145 facilitate transmission.

146

147 ***Ae. albopictus* adapted DENV-1 1806 has an increased transmission rate in *Ae.***  
148 ***albopictus*.**

149 To investigate whether the mosquito adapted DENV-1 1806 has increased transmission  
150 potential as compared to the parental isolate, *Ae. aegypti* Pazar (Turkey) and *Ae. albopictus*  
151 Nice (France) were provided with an infectious blood-meal containing  $10^7$  FFU/mL DENV-1  
152 1806 parental, or replicate of the mosquito passaged virus (R1 and R2). Viral infection rates  
153 were high (>40%) and higher for the P10 viruses in *Ae. albopictus* at 21 dpi (Fig. 4a-b). Viral  
154 dissemination was lower at early dpi but remained high at 21 dpi in both mosquito species  
155 with a higher dissemination of P10 viruses compared to the parental virus (Fig. 4c-d).  
156 Transmission was surprisingly low in *Ae. aegypti* (Fig. 4E) compared to *Ae. albopictus* (Fig.  
157 4f) suggesting a stronger effect of salivary glands as a barrier to virus release in saliva of *Ae.*  
158 *aegypti*. At 21 dpi, the two P10 viruses had higher infection rates (Fig. 4b), higher  
159 dissemination rates (Fig. 4d) and higher transmission rates (~2.5 fold) in *Ae. albopictus* than  
160 their parental strain (Fisher's exact test:  $p < 10^{-4}$ ; IR,  $p = 0.0001$ ; DE,  $p = 0.0001$ ; TE,  $p =$   
161  $0.022$ ). Collectively, these results indicate that the accumulation of adaptive mutations during  
162 passaging in *Ae. albopictus* for the P10\_R1 and P10\_R2 viruses is beneficial for virus  
163 infection, dissemination and thus transmission by *Ae. albopictus* mosquitoes.

164

165 ***Ae. albopictus* adapted DENV-1 1806 has a replicative advantage in RNAi-competent**  
166 **and -deficient mosquito cells.**

167 To determine whether the adaptive mutations in DENV-1 1806 after serial passaging in *Ae.*  
168 *albopictus* mosquitoes were causing a replicative advantage, we examined the replication  
169 kinetics of DENV-1 1806 parental, R1 and R2 in *Ae. albopictus* C6/36 (RNAi-deficient) and

170 U4.4 (RNAi-competent) cells (Fig. 5a-b) compared to kinetics in HFF cells (Fig. 5c). In  
171 C6/36 cells, the parental virus reached slightly lower titers at 6, 24 and 48 hours post-  
172 infection (hpi) as compared to the mosquito passaged R1/R2 viruses (Fig. 5a). The mosquito  
173 adapted R1/R2 viruses presented a significant increase in viral titer at 24 hpi (R1 (mean  $\pm$   
174 SD):  $\text{Log}_{10} 4.42 \pm 0.10$ ; R2:  $\text{Log}_{10} 4.68 \pm 0.14$ ) compared to the parental strain ( $\text{Log}_{10} 3.31 \pm$   
175  $0.15$ ) ( $\chi^2$  test:  $p = 0.027$ ). In U4.4 cells, the same trend was observed (Fig. 5b) with a lower  
176 titer at 24 hpi for the parental strain ( $\text{Log}_{10} 2.84 \pm 0.06$ ) as opposed to the two P10 viruses  
177 (R1:  $\text{Log}_{10} 4.19 \pm 0.29$ ; R2:  $\text{Log}_{10} 4.47 \pm 0.03$ ). In human cells (Fig. 5c), viral titers remained  
178 between 2 and 3  $\text{Log}_{10}$  from 0 to 72 hpi. These results indicate that the adaptive mutations  
179 after serial passaging of DENV-1 1806 in *Ae. albopictus* mosquitoes increase the replication  
180 rate in mosquito cells and a disadvantage in human cells.

181

#### 182 **Vizualisation of substitutions in 3'UTR of DENV-1 1806 on RNA stem-loop structures.**

183 The highly structured flavivirus 3'UTR is important for virus replication, genome translation  
184 and production of non-coding sfRNA (38). sfRNA is formed as a result of incomplete  
185 degradation of the viral genomic RNA by the 5'-3' exoribonuclease XRN1, which stalls on  
186 stem loop (SL) and dumbbell (DB) RNA structures in the 3'UTR (38, 39). It has been shown  
187 that passaging DENV on mosquito cells can result in high mutation rates in the 3'UTR and  
188 might alter the abundance of sfRNA during infection (33, 40). The largest sfRNA species,  
189 sfRNA1, determines pathogenicity (41), inhibits host innate immunity (27, 42) and is  
190 essential for efficient transmission of flaviviruses by mosquitoes (28-32, 43, 44). We  
191 therefore investigated if the consensus level mutation 10,418 that occurred in the 3'UTR after  
192 passaging could lead to changes in the 3'UTR secondary RNA structures and subsequent  
193 sfRNA formation. Mutations with an SNV frequency  $\geq 0.05$  only occurred in the SL-II and  
194 3'SL structures (Fig. 6a; red nucleotides). When examining mutations in the 3'SL, the same  
195 SNVs were found in the two parental strains and the passages 10 indicating that those



196 mutations were already present in the initial viral populations and were not selected  
197 consequently to serial passages in mosquitoes (Fig. 6b). We observed that the mosquito  
198 passaged DENV-1 1806 presented a U→C substitution at position 10,418 on the top of SL-II,  
199 which was not observed for DENV-1 30A. SL-II is the XRN1 stalling structure required for  
200 sfRNA2 formation, which requires the presence of a RNA pseudoknot interaction and a  
201 complex tertiary folding (45) (Fig. 6b). Pseudoknot formation and other known tertiary RNA  
202 interactions are not expected to be directly disrupted due to the 10,4018 sequence change  
203 (Fig. 6b). However, the U→C mutation may indirectly affect the 3D folding of the stem loop.  
204 Passages on C6/36 cells also gave rise to lower-frequency mutations in SL-II (frequency <  
205 0.2), but none of them reached consensus level.

206

207 **Increased transmission potential of *Ae. albopictus*-adapted DENV-1 is not associated**  
208 **with significantly increased sfRNA production.**

209 As sfRNAs are generated due to stalling of XRN1 on RNA secondary structures in the viral  
210 3'UTR (41), sequence changes in the 3'UTR, in particular those that occur in RNA structures  
211 involved in XRN1 stalling, may affect the length and expression level of sfRNAs. To  
212 investigate whether the production of sfRNA is affected by the mutation 10,418 in DENV-1  
213 1806 R1/R2, a Northern blot analysis was performed using a 3'UTR specific probe on total  
214 RNA extracted from U4.4 cells infected with DENV-1 1806 parental, R1 or R2 (Fig. 7). Viral  
215 gRNA and abundant sfRNA1 were produced by both the parental and R1/R2 viruses (Fig. 7a).  
216 The quantity of sfRNA1 was visually similar across all samples on the gel, although ImageJ  
217 quantification of the band intensities revealed that the ratio of sfRNA/gRNA was ~1.5 fold  
218 higher in R1 and R2 samples as compared to the parental samples (Fig. 7b). Minimal amounts  
219 of smaller sfRNA species (i.e. sfRNA2, 3, 4) were observed, indicating that DENV-1  
220 predominantly produces sfRNA1 during infection of mosquito cells. These results show that

221 the increased transmission potential of the *Ae. albopictus* adapted DENV-1 1806 is unlikely to  
222 be caused by differences in sfRNA production.

223

224 **The 10,418 mutation alone does not significantly enhance DENV-1 transmission by *Ae.***  
225 ***albopictus***

226 To test whether the U→C substitution at position 10,418 alone would recapitulate the  
227 observed phenotype in *Ae. albopictus*, three reverse genetic constructs (Parental construct,  
228 P10 construct 1 and P10 construct 2) were produced using the ISA method and then  
229 sequenced. As expected, the two P10 constructs presented the 10,418 mutation at a frequency  
230 close to 100% (Table S5). The genetic constructs also displayed other SNVs at frequencies  
231 higher than 5% but none of them reached consensus level with the exception of one SNV with  
232 52.5% frequency in P10 construct 1 (5173/nsp3) and two SNVs close to fixation in P10  
233 construct 2 (7321/nsp4b and 9571/nsp5).

234 Twenty-one days after an infectious blood meal containing the reverse genetic  
235 constructs, *Ae. albopictus* Nice mosquitoes were examined for transmission by analyzing viral  
236 particles in their saliva. When estimating the transmission efficiency, no significant  
237 differences were detected when comparing the five viral strains, the reverse genetic constructs  
238 in reference to the template (Parental, P10) and the two P10 constructs (1 and 2) (Fisher's  
239 exact test:  $p > 0.05$ ) (Fig. 8a). Similarly, when examining the number of viral particles in  
240 individual mosquito saliva, no statistical significance was found whatever the comparison  
241 (Wilcoxon Rank-Sum test:  $p > 0.05$ ) (Fig. 8b).

242 To confirm the profile of P10 construct 1, we performed a replicate using the same  
243 experimental design. TE (Fig. 8c) and the viral load in saliva (Fig. 8d) were determined. We  
244 found that the replicate 2 shares the same profile than the replicate 1 (Fig. 8a, 8b). Altogether,  
245 these results indicate that the mutation 10,418 alone does not enhance transmission of DENV-  
246 1 in *Ae. albopictus*.

247

## 248 **Discussion**

249 In this study, we developed an experimental evolution approach to enhance the transmission  
250 of DENV-1 by the vector *Ae. albopictus*. A number of conserved nucleotide variants were  
251 observed in all mosquito-passaged DENV-1 viruses, but not in the viruses passaged in  
252 mosquito cells, indicating that DENV-1 virus adapts specifically to cope with the adaptive  
253 pressure in the mosquito. A nucleotide change at position 10,418 in the 3'UTR was observed  
254 in both replicates of the *Ae. albopictus* adapted DENV-1 1806. Independent fixation of the  
255 mutation in two replicates with a sharp rise in frequency is consistent with adaptive evolution.  
256 Importantly, the *Ae. albopictus* adapted isolates displayed higher DENV-1 infection,  
257 dissemination and transmission efficiencies in *Ae. albopictus*. Our results show that we have  
258 successfully adapted DENV-1 to *Ae. albopictus*, through selection of adaptive mutations  
259 including the 10,418 mutation in the 3'UTR of the viral genome by sequential passaging *in*  
260 *vivo*.

261 *Ae. albopictus* usually acts as a secondary vector of DENV (20), but in the absence of  
262 *Ae. aegypti*, it can act as the main vector in some regions including Europe (9-13). First  
263 detected in Albania in 1979 (16), *Ae. albopictus* is now present in more than 20 European  
264 countries (18). We showed that *Ae. albopictus* from France, Italy and Spain were susceptible  
265 to infection by DENV-1 (Fig. 1), indicating that *Ae. albopictus* is indeed a vector species for  
266 DENV in Europe. The main sources of introductions in Europe were mosquitoes from Italy,  
267 which were previously imported from North America (46). Recurrent introduction events  
268 have contributed to increase the genetic diversity of European *Ae. albopictus* populations  
269 (47), an important factor shaping vector competence (25).

270 Here, we experimentally selected DENV-1 isolates for enhanced transmission by *Ae.*  
271 *albopictus*. Our experimental procedure was designed to accelerate the selection process of  
272 DENV-1 by serial passages in *Ae. albopictus* mosquitoes without alternation in the

273 mammalian host. After 10 passages in *Ae. albopictus* collected in Nice, France, we  
274 successfully adapted DENV-1 1806 and DENV-1 30A to *Ae. albopictus* through the  
275 accumulation of adaptive mutations across the genome, although only a single mutation was  
276 fixed in both replicates for the 1806 isolate. Importantly, for DENV-1 1806, these adaptive  
277 mutations increased the infection, dissemination and transmission rates of DENV-1 by *Ae.*  
278 *albopictus* (Fig. 4). Furthermore, growth kinetics of the DENV-1 1806 viruses were increased  
279 in both RNAi-competent U4.4 and RNAi-deficient C6/36 cells, indicating that the mutations  
280 cause an increase in viral replicative fitness in cell cultures regardless of a functional RNAi  
281 machinery (Fig. 5). These mosquito-selected viral variants were less adapted to replicate on  
282 mammalian cells (48). In a similar approach, Stapleford et al. (2014) succeeded in monitoring  
283 the selection of epidemic variants of CHIKV adapted to *Ae. albopictus* consolidating the idea  
284 that *in vivo* approaches can contribute in predicting new variants able to emerge and displace  
285 currently circulating viral strains (49).

286 We identified a mutation that was fixed in both replicates of the mosquito passaged  
287 DENV-1806 isolate, suggesting that this residue is involved in the adaptive-evolution that  
288 results in the increased transmission and replication potential of the virus. This shared  
289 substitution was located at position 10,418 in the highly structured 3'UTR of the DENV-1  
290 genome. Specifically, the mutation was present in the SL-II RNA structure (Fig. 6); which is  
291 required for the production of sfRNA2 (41). XRN1 stalls at SL and dumbbell (DB) RNA  
292 structures within the 3'UTR, which results in accumulating sfRNAs of different sizes (41,  
293 50). The stalling of XRN1 occurs due to steric hindrance caused by interactions of  
294 pseudoknots (PK) and other tertiary RNA structures (45, 51). Prediction of RNA structures  
295 involved in XRN1 stalling (the so-called xrRNAs) with Mfold has proven to be an useful  
296 starting point but undeniably has limitations, e.g. pseudoknots cannot be predicted and 3D  
297 RNA folding is not taken into account. Although Mfold predictions and visual pseudoknot  
298 mapping have helped to elucidate mechanisms of XRN1 stalling (41, 45, 50), the exact

299 structural basis for XRN1 stalling, the involvement of a unique three-way junction and  
300 internal tertiary interactions were only revealed by determining the crystal structure of several  
301 xrRNAs (52, 53). In mammalian cells, sfRNA is essential for inducing pathogenicity (41),  
302 and acts as an antagonist of innate immune responses (27, 42). In mosquito cells, sfRNA has  
303 been reported as an antagonist of the RNAi response *in vitro* (54, 55) and contributes to  
304 enhance the *in vivo* infection of mosquitoes and further dissemination from the midgut into  
305 the haemocoel (32) and subsequent salivary gland infection (44). Villordo et al. (2015)  
306 previously demonstrated that when passaging DENV-2 20 times in C6/36 mosquito cells, SL-  
307 II is highly mutated while the upstream SL-I mutates mostly upon passaging in mammalian  
308 cells (40). The mutations in SL-II were shown to increase DENV-2 replication in mosquito  
309 cells (40). The mutation that we found at the position 10,418 in SL-II is in line with these  
310 findings, supporting the mutation pressure on SL-II *in vivo*, although we did not observe  
311 significant mutations during passaging in C6/36 cells.

312 For DENV-2, it has been shown that during replication in human cells, mainly sfRNA1  
313 is produced, while mosquito-adapted DENV-2 accumulates more abundant sfRNA3 and  
314 sfRNA4 (33). We show that DENV-1 1806 produced abundant sfRNA1 while quantities of  
315 sfRNA2,3 and possibly sfRNA4 were below the detection limit (Fig. 7), suggesting possible  
316 differences in the production of sfRNA species between DENV-1 and DENV-2. Despite the  
317 presence of the 10,418 mutation, the *Ae. albopictus* adapted DENV-1 1806 did not show a  
318 significantly altered production of sfRNA species. Although we cannot exclude an effect on  
319 cellular binding partners that might require an intact 3'UTR for their interaction with the viral  
320 genome (38), it is unlikely that sfRNAs were a primary driver of DENV-1 adaptation to *Ae.*  
321 *albopictus*.

322 We used reverse genetics to evaluate the effect of the 10,418 mutation on DENV-1  
323 transmission by *Ae. albopictus* mosquitoes *in vivo*, but our results did not provide  
324 experimental support for a phenotypic effect of the 10,418 mutation alone. For two different

325 genetic constructs harboring the 10,418 mutation (together with different adventitious  
326 mutations), there was no detectable difference in transmission efficiency. Introducing the  
327 10,418 did not recapitulate the adapted phenotype of the P10 viruses and points to a more  
328 complex adaptive landscape than a single-mutation effect. Because our genetic constructs  
329 focused on the 10,418 mutation did not include other mutations present in the P10 viruses, it  
330 implies that the enhanced transmission phenotype reflected the combined effect of several  
331 mutations. Such epistatic relationships have been documented to shape the adaptive  
332 landscapes of CHIKV (56, 57) and more recently DENV (58). Interestingly, the 10,418  
333 mutation was the only shared mutation among replicates of adapted viruses (Fig. 3),  
334 indicating that DENV-1 adaptation to *Ae. albopictus* can result from distinct evolutionary  
335 trajectories involving different sets of mutations.

336 Our experimental approach has succeeded in enhancing the transmission of DENV-1 by  
337 multiple passages in the *Ae. albopictus* vector. This protocol can be extended to other  
338 arboviruses and vector species, and contribute to predict future epidemic variants. Together,  
339 this may ultimately lead to new insights into the mechanisms of arbovirus transmission by  
340 mosquitoes.

341

## 342 **Materials and Methods**

### 343 **Ethics statement**

344 The Institut Pasteur animal facility has received accreditation from the French Ministry of  
345 Agriculture to perform experiments on live animals in compliance with the French and  
346 European regulations on care and protection of laboratory animals (EC Directive 2010/63,  
347 French Law 2013-118, February 6th, 2013). This study was approved by the Ethics  
348 Committee #89 and registered under the reference APAFIS#6573-2016061412077987 v2.  
349 Mice were only used for mosquito rearing as a blood source, according to approved protocol.

350

351 **Cell cultures**

352 *Ae. albopictus* C6/36 cells were maintained at 28°C in Leibovitz L-15 medium supplemented  
353 with non-essential amino-acids (NEAA) (1X), 10% fetal bovine serum (FBS), 100 units/mL  
354 penicillin and 100 µg/mL streptomycin. These cells are defective in typical siRNAs, the  
355 hallmark of exogenous RNAi mediated antiviral immunity (59). *Ae. albopictus* U4.4 cells  
356 were maintained in L-15 medium supplemented with non-essential amino-acids (1X), 10%  
357 FBS, 100 units/mL penicillin and 100 µg/mL streptomycin at 28°C. HFF (Human Foreskin  
358 Fibroblast) cells were maintained at 37°C, 5% CO<sub>2</sub> in Dulbecco's Modified Eagle medium  
359 (DMEM) supplemented with pyruvate, 10% FBS, 100 units/mL penicillin and 100 µg/mL  
360 streptomycin. The human embryonic kidney HEK-293 cells (ATCC number CCL-1573) were  
361 grown at 37°C with 5% CO<sub>2</sub> in tissue-culture flasks with vented caps, in a minimal essential  
362 medium (MEM, Life Technologies) supplemented with 7% FBS, 1% PS and 1X NEAA.

363

364 **Viruses**

365 We used two DENV-1 strains isolated from DF cases: DENV-1 1806 from an autochthonous  
366 case from Nice, France in 2010 (provided by the National Reference Center of Arboviruses,  
367 France) and DENV-1 30A from a patient in Kamphaeng Phet, Thailand in 2010 (provided by  
368 the Afrims, Thailand and under accession number HG316482 in GenBank). The 2<sup>nd</sup> passage  
369 of DENV-1 1806 on African green monkey kidney Vero cells (60) and the 2<sup>nd</sup> passage of  
370 DENV-1 30A on C6/36 *Ae. albopictus* cells (61) were used for mosquito infections. Serial  
371 dilutions were used to determine the titer of viral stocks that was expressed in focus-forming  
372 units (FFU)/mL.

373

374 **Mosquito strains**

375 Six populations of *Ae. albopictus* have been established from eggs: Genoa (Italy), Alessandria  
376 (Italy), Cornella (Spain), Martorell (Spain), Nice Jean Archet (France), and Saint-Raphael

377 (France) (Table 1). They were tested to appraise vector competence to DENV-1 isolates.  
378 Together with *Ae. albopictus* Nice Jean Archet (France), *Ae. aegypti* Pazar (Turkey) was  
379 utilized to compare vector competence using viruses isolated after 10 passages on *Ae.*  
380 *albopictus*. Eggs were collected from ovitraps and sent to the Institut Pasteur in Paris, where  
381 they were reared in standardized conditions. After hatching, larvae were distributed in pans  
382 containing a yeast tablet renewed as needed in 1 L of tap water. Adults were placed in cages  
383 maintained at  $28\pm 1^\circ\text{C}$ , at relative humidity of 80% and a light:dark cycle of 16h:8h, with free  
384 access to 10% sucrose solution. Oral infection experiments were performed using mosquitoes  
385 from the F2-F11 generations. Owing to the limited number of mosquitoes, only one biological  
386 replicate was performed for each pairing population-virus.

387

### 388 **Mosquito infections**

389 One-week-old females were starved 24 hrs prior an infectious blood-meal in a BSL-3  
390 laboratory. Five batches of 60 mosquito females were then allowed to feed for 15 min through  
391 a piece of pork intestine covering the base of a Hemotek feeder containing the infectious  
392 blood-meal maintained at  $37^\circ\text{C}$ . Only engorged females were kept and incubated under  
393 controlled conditions ( $28\pm 1^\circ\text{C}$ , relative humidity of 80%, light:dark cycle of 16h:8h).

#### 394 *For vector competence assays*

395 Fourteen and 21 days after an infectious blood-meal provided at a titer of  $10^7$  FFU/mL, vector  
396 competence was assessed based on two phenotypes: (i) viral infection of mosquito and (ii)  
397 viral dissemination from the midgut into mosquito general cavity. Infection rate (IR) was  
398 determined as the proportion of mosquitoes with infected midgut and dissemination efficiency  
399 (DE) was defined as the percentage of mosquitoes with virus detected in heads suggesting a  
400 successful viral dissemination from the midgut. IR and DE were calculated by titrating body  
401 and head homogenates.

#### 402 *For serial passages*



403 As the first autochthonous DENV cases were reported in Nice in 2010 (9), *Ae. albopictus*  
404 isolated in Nice was used to achieve the experimental selection of DENV-1 isolates (Fig. 2).  
405 Mosquitoes were orally infected with DENV-1 supernatant provided in a blood-meal at a final  
406 titer of  $10^{6.5}$  FFU/mL using the hemotek system. Engorged mosquitoes were incubated at  
407 28°C for 19-21 days and then processed for saliva collection. 15-25 saliva were pooled and  
408 the volume of the pool was adjusted to 600  $\mu$ L with DMEM prior to filtration through a  
409 Millipore H membrane (0.22  $\mu$ m). An aliquot of 300  $\mu$ L of each sample was used to inoculate  
410 a sub-confluent flask (25 cm<sup>2</sup>) of C6/36 *Ae. albopictus* cells. After 1 hr, the inoculum was  
411 discarded and cells were rinsed once with medium. Five mL of DMEM medium  
412 complemented with 2% FBS was added and cells were incubated for 8 days at 28°C. Cell  
413 culture supernatants were then collected and provided to mosquitoes to run the next passage.  
414 Passages P1 to P3 were performed with mosquitoes of the F3 generation and passages P4 to  
415 P10 with mosquitoes of the F4 generation. C6/36 supernatants collected at each passage were  
416 used undiluted for the next mosquito blood-meal. Ten passages were performed. Control  
417 isolates corresponded to serially passaged viruses on C6/36 cells to identify mutations  
418 resulting from genetic drift or adaptation to insect cell line; 500  $\mu$ L of the previous passage  
419 were used to inoculate the next flask of C6/36 cells. Two biological replicates R1 and R2  
420 were performed to test the variability between samples submitted to the same protocol of  
421 selection. Vector competence using the parental and P10 isolates was assessed by calculating:  
422 (i) infection rate (IR, proportion of mosquitoes with infected midgut), (ii) dissemination  
423 efficiency (DE, proportion of mosquitoes able to disseminate the virus from the midgut  
424 among tested mosquitoes), and (iii) transmission efficiency (TE, proportion of mosquitoes  
425 with the virus detected in saliva among tested mosquitoes).

426

427 **Virus deep sequencing**

428 Total RNA was extracted from cell culture supernatant using QIAamp Viral RNA Mini Kit  
429 (Qiagen, Germany) and DNase treated (Turbo DNase, Life Technologies, USA). Following  
430 purification with magnetic beads (Agencourt RNAClean XP, Beckman Coulter, California,  
431 USA), RNA was reverse transcribed using Transcriptor High Fidelity cDNA Synthesis Kit  
432 and a specific 3'-UTR DENV-1 primer (Roche Applied Science, Mannheim, Germany),  
433 d1a5B 5'-AGAACCTGTTGATTCAACRGC-3' (62). Second strand was then synthesized in  
434 a unique reaction with *E. coli* DNA ligase (New England Biolabs, Massachusetts, USA), *E.*  
435 *coli* DNA polymerase I (New England Biolabs), *E. coli* RNase H (New England Biolabs) in  
436 second strand synthesis buffer (New England Biolabs). After purification with magnetic beads  
437 (Agencourt AMPure XP, Beckman Coulter), dsDNA was quantified with fluorometric  
438 method (Quant-iT PicoGreen dsDNA, Invitrogen, Massachusetts, USA).

439 Sequencing libraries were prepared using Nextera XT DNA Library Preparation Kit  
440 (Illumina, San Diego, USA), multiplexed and sequenced in single end in two independent  
441 runs on an Illumina NextSeq 500 platform using a mid-output 150-cycle v2 kit (Illumina).  
442 Reads were trimmed (Trimmomatic v0.33) (63) after demultiplexing (bcl2fastq v.2.15.0,  
443 Illumina) to remove adaptor sequences, and reads shorter than 32 nucleotides were discarded.  
444 Full-length genome of the DENV-1 1806 was assembled *de novo* using Ray v2.0.0 (64) with  
445 the original stock sample. The newly assembled DENV genome contig was extended in 3'  
446 and 5' using closest BLAST hit full DENV-1 genome (accession number EU482591). This  
447 chimeric construct was used to map reads used for assembly using Bowtie 2 v2.1.0 (65).  
448 Alignment file was converted, sorted and indexed using Samtools v0.1.19 (66). Coverage and  
449 sequencing depth were assessed using bedtools v2.17.0 (67). Single nucleotide variants and  
450 their frequency were called using LoFreq\* v2.1.1 (68) and used to correct the chimeric  
451 construct. Only nucleotides with >10X coverage were conserved for generating the consensus  
452 sequence. A final full-length genome sequence for DENV-1 1806 strain was deposited to  
453 GenBank (accession number MG518567).

454 After quality control, reads from all samples were mapped to the newly assembled  
455 DENV-1 1806 strain genome sequence or previously sequenced reference genome  
456 KDH0030A (accession number HG316482) using Bowtie v2.1.0 (65). The alignment file was  
457 converted, sorted and indexed using Samtools v0.1.19 (66), and the coverage and sequencing  
458 depth were assessed for each sample using bedtools v2.17.0 (67). Single nucleotide variants  
459 (SNVs) and their frequency were then called using LoFreq\* v2.1.1 (68), and their effect at the  
460 amino-acid level was assessed by SNPgenie v1.2 (69).

461

#### 462 **RNA structure modeling in silico**

463 The Mfold Web server was used with standard settings and flat exterior loop type (70) to fold  
464 the secondary RNA structures, which were then visualized using the VARNA RNA editing  
465 package (71). Pseudoknot RNA interactions were drawn as previously described for DENV  
466 (45, 72). Mutation frequencies of individual nucleotides were determined by averaging the  
467 nucleotide allele frequency from the deep sequencing results of the duplicates per treatment.

468

#### 469 **Virus growth curves**

470 To measure viral replicative fitness, growth curves were conducted in *Ae. albopictus* C6/36  
471 and U4.4 mosquito cells, and Human Foreskin Fibroblasts (HFF) cells. Confluent cell  
472 monolayers were prepared and inoculated with viruses simultaneously in triplicates at a MOI  
473 of 0.1 PFU/cell. Cells were incubated for 1 hr in appropriate conditions and viral inoculum  
474 was removed to eliminate free virus. Five mL of medium supplemented with 2% FBS were  
475 then added and mosquito cells were incubated at 28°C (mosquito cells) or 37°C (human  
476 cells). At various times (4, 6, 8, 10, 24, 48 and 72 hrs) post-inoculation (pi), supernatants were  
477 collected and titrated by focus fluorescent assay on *Ae. albopictus* C6/36 cells. After  
478 incubation at 28°C for 5 days, plates were stained using hyper immune ascetic fluid specific  
479 to DENV as primary antibody (Millipore, Molsheim, France). A Fluorescein-conjugated goat

480 anti-mouse was used as the second antibody (Thermofisher). Three viral strains were used:  
481 the parental strain and two 10<sup>th</sup> passages, P10\_R1 and P10\_R2. Viral titer was expressed in  
482 FFU/mL. Three biological replicates were performed for each cell-virus pairing.

483

#### 484 **RNA isolation and Northern blotting**

485 Total RNA was isolated from cell monolayers using TRIzol reagent (Invitrogen,  
486 Massachusetts, France) following the manufacturer's protocol. Mosquito DENV-1 infected  
487 bodies were homogenized individually in 500 µL of Leibovitz L15 medium (Invitrogen)  
488 supplemented with 2% fetal bovine serum for 1 min at maximum speed. Homogenates were  
489 then filtered with a filter unit (0.22 µm) (Ultrafree® MC-GV, Merck, New Jersey, USA).

490 Two samples of each filtrate were inoculated onto monolayers of *Ae. albopictus* C6/36 cell  
491 culture in 6-well plates. After incubation at 28°C for 6 days, samples were homogenized with  
492 1 mL TRIzol reagent. RNA isolations were performed using the standard TRIzol protocol.

493 Samples were eluted in 30 µL RNase-free Milli-Q water and stored at -80°C until further  
494 processing. A DENV-1 3'UTR specific probe was generated by PCR reaction with GoTaq

495 Polymerase (Promega, Wisconsin, USA) containing DIG DNA-labelling mix (Roche) and  
496 primers DENV-1 3'UTR FW (AGTCAGGCCAGATTAAGCCATAGTACGG) and DENV-1

497 3'UTR RV (ATTCCATTTTCTGGCGTTCTGTGCCTGG) using cDNA from cells infected  
498 with DENV-1 1806 as a template. Five micrograms of total RNA was subjected to sRNA-

499 optimized northern blot as has been described previously (32). Briefly, total RNA was

500 denatured and size separated on 6% polyacrylamide-7 M urea-0.5× Tris-borate-EDTA (TBE)

501 gel for 1.45 hrs at 150 V. The RNA was semi-dry-blotted on a Hybond-N membrane, UV

502 cross-linked and pre-hybridized for 1 hr at 50°C in modified Church buffer containing 10%

503 formamide. DENV-1 3'UTR specific Dig-labelled probe was denatured and blots were

504 hybridized overnight at 50°C in modified church/10% formamide buffer containing 2 µL of

505 DIG-labelled probe. Blots were developed with AP-labeled anti-DIG antibodies and NBT-

506 BCIP solution before observing the signal using a Bio-Rad Gel Doc scanner. Quantification  
507 of band signal intensities was performed in ImageJ by transforming the image to 8-bit format,  
508 inverting the image, and analyzing the band intensity using the measure function. The Ratio  
509 sfRNA/gRNA was calculated by dividing the intensity of the sfRNA by the intensity of the  
510 gRNA band for each sample, and then normalized to the average ratio of the parental samples.

511

### 512 **ISA reverse genetics**

513 The T>C mutation at position 10,418 identified at passage 10 was inserted into a DENV-1  
514 1806 backbone using the ISA (Infectious Subgenomic Amplicons) reverse genetics method as  
515 previously described (73).

### 516 *Preparation of subgenomic DNA fragments*

517 The viral genome was amplified by RT-PCR from the DENV-1 1806 viral RNA as three  
518 overlapping DNA fragments. Two additional fragments were *de novo* synthesized (Genscript)  
519 and amplified by PCR (primers are listed in Table S6). The first primer consisted of the  
520 human cytomegalovirus promoter (pCMV) and the second primer of the last 367 nucleotides  
521 of the 3'UTR of the DENV-1 1806 with or without the 10,418 T>C mutation and the hepatitis  
522 delta ribozyme followed by the simian virus 40 polyadenylation signal (HDR/SV40pA)  
523 (sequences are listed in Supplemental Text). RT mixes were prepared using the superscript IV  
524 reverse transcriptase kit (Life Technologies, CA, USA) and PCR mixes using the Q5® High-  
525 Fidelity PCR Kit (New England Biolabs, MA, USA) following the manufacturer's  
526 instructions. RT were performed in the following conditions: 25°C for 10 min followed by  
527 37°C for 50 min and 70°C 15 min. PCR amplifications were performed in the following  
528 conditions: 98°C for 30 sec followed by 35 cycles of 98°C for 10 s, 62°C for 30 s,  
529 72°C for 2 min 30 s, with a 2 min final elongation at 72°C. PCR product sizes and  
530 quality were controlled by running gel electrophoresis and DNA fragments were purified  
531 using a QIAquick PCR Purification Kit (Qiagen, Hilden, Germany).

## 532 *Cell transfection*

533 HEK-293 cells were seeded into six-well cell culture plates one day prior to transfection.  
534 Cells were transfected with 2 µg of an equimolar mix of the five DNA fragments using  
535 lipofectamine 3000 (Life Technologies) following the manufacturer's instructions. Each  
536 transfection was performed in five replicates. After incubating for 24 hrs, the cell supernatant  
537 medium was removed and replaced by fresh cell culture medium. Seven days post-  
538 transfection, cell supernatant medium was passaged two times using six-well cell culture  
539 plates of confluent C6/36 cells. Cells were subsequently inoculated with 100 µL of diluted  
540 (1/3) cell supernatant media, incubated 1 hr, washed with PBS 1X, and incubated 7 days with  
541 3 mL of medium. Remaining cell supernatant medium was stored at -80 °C. The second  
542 passage was used to produce virus stock solutions of DENV-1 1806 WT and mutant viruses.  
543 Transmission efficiency was assessed 21 days after an infectious blood meal containing the  
544 Parental, the Parental construct, the P10 strain, the P10 constructs (1 and 2) provided  
545 separately at a titer of  $10^7$  FFU/mL.

546

## 547 **Statistical analyses**

548 Statistical analyses were conducted using the STATA software (StataCorp LP, Texas, and  
549 USA). P-values > 0.05 were considered non-significant. If necessary, the significance level of  
550 each test was adjusted based on the number of tests run, according to the sequential method of  
551 Bonferroni (74).

552

## 553 **Acknowledgments**

554 The authors thank Pascal Delaunay (Centre Hospitalier Universitaire Nice, France), Ashgar  
555 Talbalaghi (Vector Control, Italy), Roger Eritja (Universitat de Barcelona, Spain), Vincent  
556 Robert (IRD, Montpellier) for providing mosquito eggs. This study was supported by a grant  
557 FP7-HEALTH HEALTH.2011.2.3.3-2 (grant number: 282378) "Dengue research Framework

558 for resisting epidemics in Europe” (DENFREE), the French Government's Investissement  
559 d'Avenir program, Laboratoire d'Excellence "Integrative Biology of Emerging Infectious  
560 Diseases" (grant n°ANR-10-LABX-62-IBEID), the European Union's Horizon 2020 research  
561 and innovation programme under ZIKAlliance grant agreement No 734548 and the Institut  
562 Pasteur. PY was supported by the Pasteur-Paris University (PPU) program. LL received  
563 support from Agence Nationale de la Recherche (grant ANR-17-ERC2-0016-01), the City of  
564 Paris Emergence(s) program in Biomedical Research, and the European Union's Horizon  
565 2020 research and innovation programme under ZikaPLAN grant agreement No 734584. The  
566 funders had no role in study design, data collection and analysis, decision to publish, or  
567 preparation of the manuscript.

568

#### 569 **Author contributions**

570 LL and ABF designed the research. RB, SL, HJ, GPG, LM, GP, and FA performed  
571 experiments. LM, GP, PSY, GG, and MV provided reagents and analytical tools. AS and  
572 XDL provided expertise and feedback. RB, SL, HJ, GPG, GPP, and ABF analyzed the data.  
573 GPG, GPP, LL, and ABF wrote the manuscript. LL and ABF secure funding.

574

#### 575 **Declaration of interests**

576 The authors declare no competing interests.

577

#### 578 **References**

- 579 1. Jones KE, Patel NG, Levy MA, Storeygard A, Balk D, Gittleman JL, et al. Global trends in  
580 emerging infectious diseases. *Nature*. 2008;451(7181):990-3.
- 581 2. Liang G, Gao X, Gould EA. Factors responsible for the emergence of arboviruses; strategies,  
582 challenges and limitations for their control. *Emerg Microbes Infect*. 2015;4(3):e18.
- 583 3. Bhatt S, Gething PW, Brady OJ, Messina JP, Farlow AW, Moyes CL, et al. The global  
584 distribution and burden of dengue. *Nature*. 2013;496(7446):504-7.
- 585 4. Calisher CH, Karabatsos N, Dalrymple JM, Shope RE, Porterfield JS, Westaway EG, et al.  
586 Antigenic relationships between flaviviruses as determined by cross-neutralization tests with  
587 polyclonal antisera. *J Gen Virol*. 1989;70 ( Pt 1):37-43.

- 588 5. Guzman MG, Harris E. Dengue. *Lancet*. 2015;385(9966):453-65.
- 589 6. Anon. The dengue epidemic in Greece. *League Nations Monthly Epidemiol Rep*. 1928;7:334.
- 590 7. Rezza G. Dengue and chikungunya: long-distance spread and outbreaks in naive areas.  
591 *Pathog Glob Health*. 2014;108(8):349-55.
- 592 8. Curtin TJ. Status of *Aedes aegypti* in the Eastern Mediterranean. *J Med Entomol*.  
593 1967;4(1):48-50.
- 594 9. La Ruche G, Souares Y, Armengaud A, Peloux-Petiot F, Delaunay P, Despres P, et al. First two  
595 autochthonous dengue virus infections in metropolitan France, September 2010. *Euro surveillance* :  
596 bulletin Europeen sur les maladies transmissibles = European communicable disease bulletin.  
597 2010;15(39):19676.
- 598 10. Gjenero-Margan I, Aleraj B, Krajcar D, Lesnikar V, Klobucar A, Pem-Novosel I, et al.  
599 Autochthonous dengue fever in Croatia, August-September 2010. *Euro surveillance* : bulletin  
600 Europeen sur les maladies transmissibles = European communicable disease bulletin. 2011;16(9):pii:  
601 19805.
- 602 11. Marchand E, Prat C, Jeannin C, Lafont E, Bergmann T, Flusin O, et al. Autochthonous case of  
603 dengue in France, October 2013. *Euro surveillance* : bulletin Europeen sur les maladies transmissibles  
604 = European communicable disease bulletin. 2013;18(50):20661.
- 605 12. Giron S, Rizzi J, Leparc-Goffart I, Septfons A, Tine R, Cadiou B, et al. Nouvelles apparitions de  
606 cas autochtones de dengue en région Provence-Alpes-Côte d'Azur, France, août-septembre 2014.  
607 *Bull Epidémiol Hebd*. 2015;13-14:217-25.
- 608 13. Succo T, Leparc-Goffart I, Ferre JB, Roiz D, Broche B, Maquart M, et al. Autochthonous  
609 dengue outbreak in Nimes, South of France, July to September 2015. *Euro surveillance* : bulletin  
610 Europeen sur les maladies transmissibles = European communicable disease bulletin. 2016;21(21).
- 611 14. Franke F, Giron S, Cochet A, Jeannin C, Leparc-Goffart I, de Valk H, et al. Émergences de  
612 dengue et de chikungunya en France métropolitaine, 2010-2018. *Bull Epidémiol Hebd*. 2019;19-  
613 20:374-82.
- 614 15. France SP. 2019. Available from: [https://www.santepubliquefrance.fr/maladies-et-  
615 traumatismes/maladies-a-transmission-vectorielle/chikungunya/articles/donnees-en-france-  
616 metropolitaine/chikungunya-dengue-et-zika-donnees-de-la-surveillance-renforcee-en-france-  
617 metropolitaine-en-2019](https://www.santepubliquefrance.fr/maladies-et-traumatismes/maladies-a-transmission-vectorielle/chikungunya/articles/donnees-en-france-metropolitaine/chikungunya-dengue-et-zika-donnees-de-la-surveillance-renforcee-en-france-metropolitaine-en-2019).
- 618 16. Adhami J, Reiter P. Introduction and establishment of *Aedes (Stegomyia) albopictus* skuse  
619 (Diptera: Culicidae) in Albania. *J Am Mosq Control Assoc*. 1998;14(3):340-3.
- 620 17. Sabatini A, Raineri V, Trovato G, Coluzzi M. [*Aedes albopictus* in Italy and possible diffusion of  
621 the species into the Mediterranean area]. *Parassitologia*. 1990;32(3):301-4.
- 622 18. Medlock JM, Hansford KM, Versteirt V, Cull B, Kampen H, Fontenille D, et al. An  
623 entomological review of invasive mosquitoes in Europe. *Bull Entomol Res*. 2015;105(6):637-63.
- 624 19. Vega-Rua A, Zouache K, Caro V, Diancourt L, Delaunay P, Grandadam M, et al. High efficiency  
625 of temperate *Aedes albopictus* to transmit chikungunya and dengue viruses in the Southeast of  
626 France. *PLoS One*. 2013;8(3):e59716.
- 627 20. Paupy C, Delatte H, Bagny L, Corbel V, Fontenille D. *Aedes albopictus*, an arbovirus vector:  
628 from the darkness to the light. *Microbes and infection / Institut Pasteur*. 2009;11(14-15):1177-85.
- 629 21. Metselaar D, Grainger CR, Oei KG, Reynolds DG, Pudney M, Leake CJ, et al. An outbreak of  
630 type 2 dengue fever in the Seychelles, probably transmitted by *Aedes albopictus* (Skuse). *Bulletin of  
631 the World Health Organization*. 1980;58(6):937-43.
- 632 22. Sabin AB. Research on dengue during World War II. *The American journal of tropical  
633 medicine and hygiene*. 1952;1(1):30-50.
- 634 23. Coulanges P, Clercy Y, Jousset FX, Rodhain F, Hannoun C. [Dengue at Reunion: isolation of a  
635 strain at the Pasteur Institute of Madagascar]. *Bull Soc Pathol Exot*. 1979;72(3):205-9.
- 636 24. Effler PV, Pang L, Kitsutani P, Vorndam V, Nakata M, Ayers T, et al. Dengue fever, Hawaii,  
637 2001-2002. *Emerg Infect Dis*. 2005;11(5):742-9.
- 638 25. Lambrechts L, Scott TW, Gubler DJ. Consequences of the expanding global distribution of  
639 *Aedes albopictus* for dengue virus transmission. *PLoS Negl Trop Dis*. 2010;4(5):e646.



- 640 26. Wang E, Ni H, Xu R, Barret ADT, Watowich SJ, Gubler DJ, et al. Evolutionary relationships of  
641 endemic/epidemic and sylvatic dengue viruses. *J Virol.* 2000;74(7):3227-34.
- 642 27. Manokaran G, Finol E, Wang C, Gunaratne J, Bahl J, Ong EZ, et al. Dengue subgenomic RNA  
643 binds TRIM25 to inhibit interferon expression for epidemiological fitness. *Science (New York, NY).*  
644 2015;350(6257):217-21.
- 645 28. Slonchak A, Hugo LE, Freney ME, Hall-Mendelin S, Amarilla AA, Torres FJ, et al. Zika virus  
646 noncoding RNA suppresses apoptosis and is required for virus transmission by mosquitoes. *Nat*  
647 *Commun.* 2020;11(1):2205.
- 648 29. Goertz GP, van Bree JWM, Hiralal A, Fernhout BM, Steffens C, Boeren S, et al. Subgenomic  
649 flavivirus RNA binds the mosquito DEAD/H-box helicase ME31B and determines Zika virus  
650 transmission by *Aedes aegypti*. *Proc Natl Acad Sci U S A.* 2019;116(38):19136-44.
- 651 30. Yeh SC, Pompon J. Flaviviruses Produce a Subgenomic Flaviviral RNA That Enhances Mosquito  
652 Transmission. *DNA Cell Biol.* 2018;37(3):154-9.
- 653 31. Pompon J, Manuel M, Ng GK, Wong B, Shan C, Manokaran G, et al. Dengue subgenomic  
654 flaviviral RNA disrupts immunity in mosquito salivary glands to increase virus transmission. *PLoS*  
655 *Pathog.* 2017;13(7):e1006535.
- 656 32. Goertz GP, Fros JJ, Miesen P, Vogels CB, van der Bent ML, Geertsema C, et al. Noncoding  
657 Subgenomic Flavivirus RNA Is Processed by the Mosquito RNA Interference Machinery and  
658 Determines West Nile Virus Transmission by *Culex pipiens* Mosquitoes. *J Virol.* 2016;90(22):10145-  
659 59.
- 660 33. Filomatori CV, Carballeda JM, Villordo SM, Aguirre S, Pallares HM, Maestre AM, et al. Dengue  
661 virus genomic variation associated with mosquito adaptation defines the pattern of viral non-coding  
662 RNAs and fitness in human cells. *PLoS Pathog.* 2017;13(3):e1006265.
- 663 34. Pallares H, Costa Navarro GS, Villordo S, Merwaiss F, de Borba L, Gonzalez Lopez Ledesma  
664 MM, et al. Zika Virus sRNA Generation Requires Cooperativity between Duplicated RNA Structures  
665 that Are Essential for Productive Infection in Human Cells. *J Virol.* 2020.
- 666 35. Schuffenecker I, Iteman I, Michault A, Murri S, Frangeul L, Vaney MC, et al. Genome  
667 microevolution of chikungunya viruses causing the Indian Ocean outbreak. *PLoS Med.*  
668 2006;3(7):e263.
- 669 36. Tsetsarkin KA, Vanlandingham DL, McGee CE, Higgs S. A single mutation in chikungunya virus  
670 affects vector specificity and epidemic potential. *PLoS Pathog.* 2007;3(12):e201.
- 671 37. Vazeille M, Moutailler S, Coudrier D, Rousseaux C, Khun H, Huerre M, et al. Two Chikungunya  
672 isolates from the outbreak of La Reunion (Indian Ocean) exhibit different patterns of infection in the  
673 mosquito, *Aedes albopictus*. *PLoS One.* 2007;2(11):e1168.
- 674 38. Roby JA, Pijlman GP, Wilusz J, Khromykh AA. Noncoding subgenomic flavivirus RNA: multiple  
675 functions in West Nile virus pathogenesis and modulation of host responses. *Viruses.* 2014;6(2):404-  
676 27.
- 677 39. Goertz GP, Pijlman GP. Dengue Non-coding RNA: TRIMmed for Transmission. *Cell Host*  
678 *Microbe.* 2015;18(2):133-4.
- 679 40. Villordo SM, Filomatori CV, Sanchez-Vargas I, Blair CD, Gamarnik AV. Dengue virus RNA  
680 structure specialization facilitates host adaptation. *PLoS Pathog.* 2015;11(1):e1004604.
- 681 41. Pijlman GP, Funk A, Kondratieva N, Leung J, Torres S, van der Aa L, et al. A highly structured,  
682 nuclease-resistant, noncoding RNA produced by flaviviruses is required for pathogenicity. *Cell Host*  
683 *Microbe.* 2008;4(6):579-91.
- 684 42. Schuessler A, Funk A, Lazear HM, Cooper DA, Torres S, Daffis S, et al. West Nile virus  
685 noncoding subgenomic RNA contributes to viral evasion of the type I interferon-mediated antiviral  
686 response. *J Virol.* 2012;86(10):5708-18.
- 687 43. Vogels CB, van de Peppel LJ, van Vliet AJ, Westenberg M, Ibanez-Justicia A, Stroo A, et al.  
688 Winter Activity and Aboveground Hybridization Between the Two Biotypes of the West Nile Virus  
689 Vector *Culex pipiens*. *Vector Borne Zoonotic Dis.* 2015;15(10):619-26.
- 690 44. Pompon J, Morales-Vargas R, Manuel M, Huat Tan C, Vial T, Hao Tan J, et al. A Zika virus from  
691 America is more efficiently transmitted than an Asian virus by *Aedes aegypti* mosquitoes from Asia.  
692 *Sci Rep.* 2017;7(1):1215.

- 693 45. Chapman EG, Moon SL, Wilusz J, Kieft JS. RNA structures that resist degradation by Xrn1  
694 produce a pathogenic Dengue virus RNA. *Elife*. 2014;3:e01892.
- 695 46. Manni M, Guglielmino CR, Scolari F, Vega-Rua A, Failloux AB, Somboon P, et al. Genetic  
696 evidence for a worldwide chaotic dispersion pattern of the arbovirus vector, *Aedes albopictus*. *PLoS*  
697 *Negl Trop Dis*. 2017;11(1):e0005332.
- 698 47. Sherpa S, Rioux D, Pougnet-Lagarde C, Despres L. Genetic diversity and distribution differ  
699 between long-established and recently introduced populations in the invasive mosquito *Aedes*  
700 *albopictus*. *Infect Genet Evol*. 2018;58:145-56.
- 701 48. Vasilakis N, Deardorff ER, Kenney JL, Rossi SL, Hanley KA, Weaver SC. Mosquitoes put the  
702 brake on arbovirus evolution: experimental evolution reveals slower mutation accumulation in  
703 mosquito than vertebrate cells. *PLoS Pathog*. 2009;5(6):e1000467.
- 704 49. Stapleford KA, Coffey LL, Lay S, Borderia AV, Duong V, Isakov O, et al. Emergence and  
705 transmission of arbovirus evolutionary intermediates with epidemic potential. *Cell Host Microbe*.  
706 2014;15(6):706-16.
- 707 50. Funk A, Truong K, Nagasaki T, Torres S, Floden N, Balmori Melian E, et al. RNA structures  
708 required for production of subgenomic flavivirus RNA. *J Virol*. 2010;84(21):11407-17.
- 709 51. Akiyama BM, Eiler D, Kieft JS. Structured RNAs that evade or confound exonucleases:  
710 function follows form. *Curr Opin Struct Biol*. 2016;36:40-7.
- 711 52. Chapman EG, Costantino DA, Rabe JL, Moon SL, Wilusz J, Nix JC, et al. The structural basis of  
712 pathogenic subgenomic flavivirus RNA (sfRNA) production. *Science*. 2014;344(6181):307-10.
- 713 53. Akiyama BM, Laurence HM, Massey AR, Costantino DA, Xie X, Yang Y, et al. Zika virus  
714 produces noncoding RNAs using a multi-pseudoknot structure that confounds a cellular exonuclease.  
715 *Science*. 2016;354(6316):1148-52.
- 716 54. Moon SL, Dodd BJ, Brackney DE, Wilusz CJ, Ebel GD, Wilusz J. Flavivirus sfRNA suppresses  
717 antiviral RNA interference in cultured cells and mosquitoes and directly interacts with the RNAi  
718 machinery. *Virology*. 2015;485:322-9.
- 719 55. Schnettler E, Sterken MG, Leung JY, Metz SW, Geertsema C, Goldbach RW, et al. Noncoding  
720 flavivirus RNA displays RNA interference suppressor activity in insect and Mammalian cells. *J Virol*.  
721 2012;86(24):13486-500.
- 722 56. Tsetsarkin KA, McGee CE, Volk SM, Vanlandingham DL, Weaver SC, Higgs S. Epistatic roles of  
723 E2 glycoprotein mutations in adaption of chikungunya virus to *Aedes albopictus* and *Ae. aegypti*  
724 mosquitoes. *PLoS One*. 2009;4(8):e6835.
- 725 57. Tsetsarkin KA, Chen R, Sherman MB, Weaver SC. Chikungunya virus: evolution and genetic  
726 determinants of emergence. *Curr Opin Virol*. 2011;1(4):310-7.
- 727 58. Syenina A, Vijaykrishna D, Gan ES, Tan HC, Choy MM, Siriphanitchakorn T, et al. Positive  
728 epistasis between viral polymerase and the 3' untranslated region of its genome reveals the  
729 epidemiologic fitness of dengue virus. *Proc Natl Acad Sci U S A*. 2020;117(20):11038-47.
- 730 59. Brackney DE, Scott JC, Sagawa F, Woodward JE, Miller NA, Schilkey FD, et al. C6/36 *Aedes*  
731 *albopictus* cells have a dysfunctional antiviral RNA interference response. *PLoS Negl Trop Dis*.  
732 2010;4(10):e856.
- 733 60. Grandadam M, Caro V, Plumet S, Thiberge JM, Souares Y, Failloux AB, et al. Chikungunya  
734 virus, southeastern France. *Emerg Infect Dis*. 2011;17(5):910-3.
- 735 61. Fansiri T, Fontaine A, Diancourt L, Caro V, Thaisomboonsuk B, Richardson JH, et al. Genetic  
736 mapping of specific interactions between *Aedes aegypti* mosquitoes and dengue viruses. *PLoS Genet*.  
737 2013;9(8):e1003621.
- 738 62. Christenbury JG, Aw PP, Ong SH, Schreiber MJ, Chow A, Gubler DJ, et al. A method for full  
739 genome sequencing of all four serotypes of the dengue virus. *J Virol Methods*. 2010;169(1):202-6.
- 740 63. Bolger AM, Lohse M, Usadel B. Trimmomatic: a flexible trimmer for Illumina sequence data.  
741 *Bioinformatics*. 2014;30(15):2114-20.
- 742 64. Boisvert S, Raymond F, Godzaridis E, Laviolette F, Corbeil J. Ray Meta: scalable de novo  
743 metagenome assembly and profiling. *Genome Biol*. 2012;13(12):R122.
- 744 65. Langmead B, Salzberg SL. Fast gapped-read alignment with Bowtie 2. *Nat Methods*.  
745 2012;9(4):357-9.

- 746 66. Li H, Handsaker B, Wysoker A, Fennell T, Ruan J, Homer N, et al. The Sequence  
747 Alignment/Map format and SAMtools. *Bioinformatics*. 2009;25(16):2078-9.
- 748 67. Quinlan AR, Hall IM. BEDTools: a flexible suite of utilities for comparing genomic features.  
749 *Bioinformatics*. 2010;26(6):841-2.
- 750 68. Wilm A, Aw PP, Bertrand D, Yeo GH, Ong SH, Wong CH, et al. LoFreq: a sequence-quality  
751 aware, ultra-sensitive variant caller for uncovering cell-population heterogeneity from high-  
752 throughput sequencing datasets. *Nucleic Acids Res*. 2012;40(22):11189-201.
- 753 69. Nelson CW, Moncla LH, Hughes AL. SNPGenie: estimating evolutionary parameters to detect  
754 natural selection using pooled next-generation sequencing data. *Bioinformatics*. 2015;31(22):3709-  
755 11.
- 756 70. Zuker M. Mfold web server for nucleic acid folding and hybridization prediction. *Nucleic Acids*  
757 *Res*. 2003;31(13):3406-15.
- 758 71. Darty K, Denise A, Ponty Y. VARNA: Interactive drawing and editing of the RNA secondary  
759 structure. *Bioinformatics*. 2009;25(15):1974-5.
- 760 72. Villordo SM, Carballeda JM, Filomatori CV, Gamarnik AV. RNA Structure Duplications and  
761 Flavivirus Host Adaptation. *Trends Microbiol*. 2016;24(4):270-83.
- 762 73. Aubry F, Nougairède A, de Fabritus L, Querat G, Gould EA, de Lamballerie X. Single-stranded  
763 positive-sense RNA viruses generated in days using infectious subgenomic amplicons. *J Gen Virol*.  
764 2014;95(Pt 11):2462-7.
- 765 74. Holm S. A Simple Sequentially Rejective Multiple Test Procedure. *Scandinavian Journal of*  
766 *Statistics*. 1979;6(2):65-70.

767

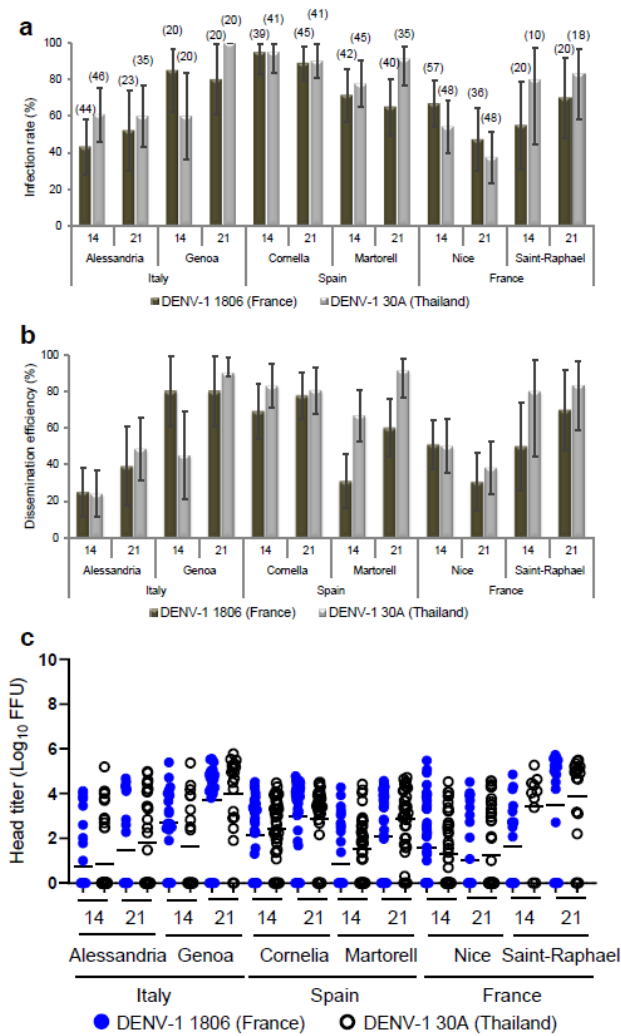

768

769 **Figure 1.** Susceptibilities of six European *Ae. albopictus* populations to DENV-1 (1806 and  
770 30A): **a** infection rate, **b** dissemination efficiency and **c** viral titers in heads. Adult female  
771 mosquitoes were challenged with DENV-1 from France (1806) and Thailand (30A) at a titer  
772 of  $10^7$  FFU/mL. At 14 and 21 dpi, mosquitoes were sacrificed and decapitated. Bodies and  
773 heads were homogenized and titrated on C6/36 cells. Infection rates were determined using  
774 positive/negative scoring (i.e. without estimating the number of viral particles), while viral  
775 titers at sites of dissemination were quantified *via* focus-forming assay. The error bars  
776 correspond to the confidence intervals (95%) (**a**, **b**), and the bar to the mean (**c**). In brackets is  
777 indicated the sample size.  
778

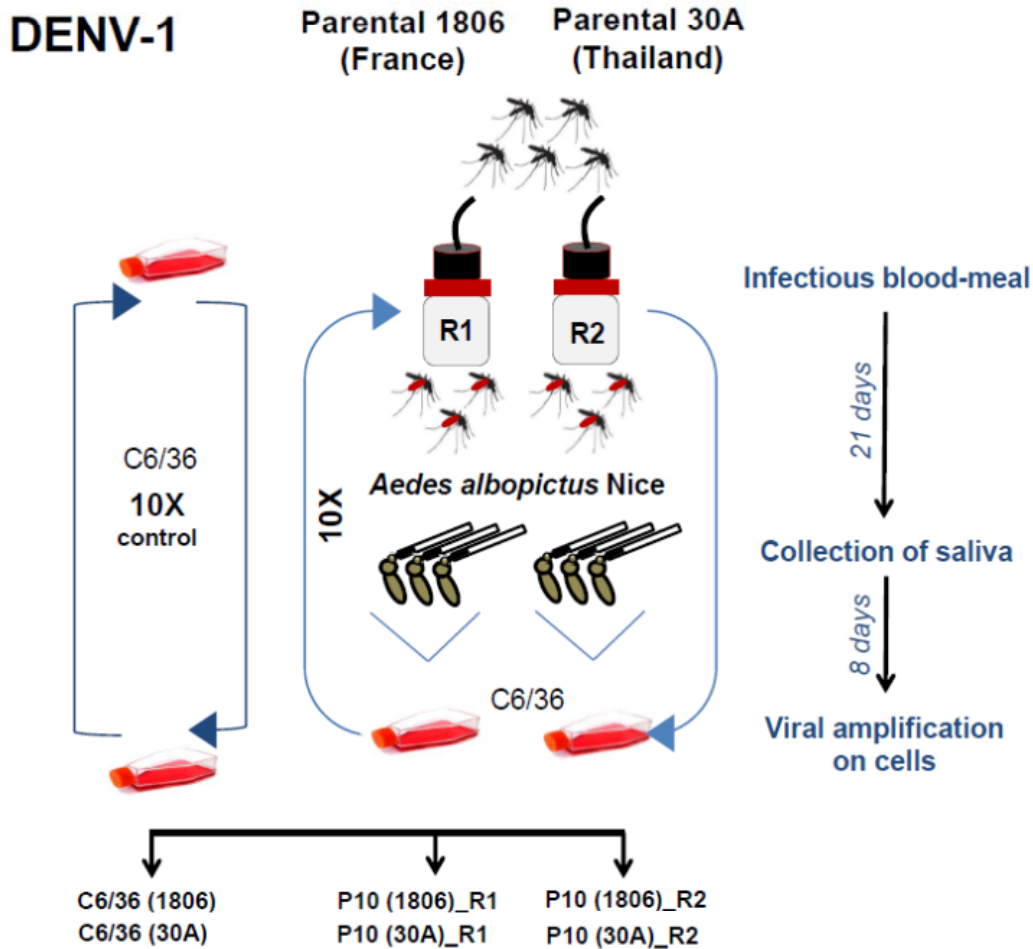

779

780

781 **Figure 2.** Experimental design for DENV-1 adaptation to *Ae. albopictus*. The parental strains  
782 1806 (France) and 30A (Thailand) were passaged 10 times on a single *Ae. albopictus*  
783 population from Nice, France. Each passage includes: mosquito infectious blood-meal with  
784 DENV-1, collection of mosquito saliva at day 21 post-infection, viral amplification of saliva  
785 on *Ae. albopictus* cell cultures for 8 days, and initiation of the next passage using the viral  
786 suspension obtained. Control isolates were serially passaged 10 times on C6/36 cells. Two  
787 replicates R1 and R2 were performed.

788

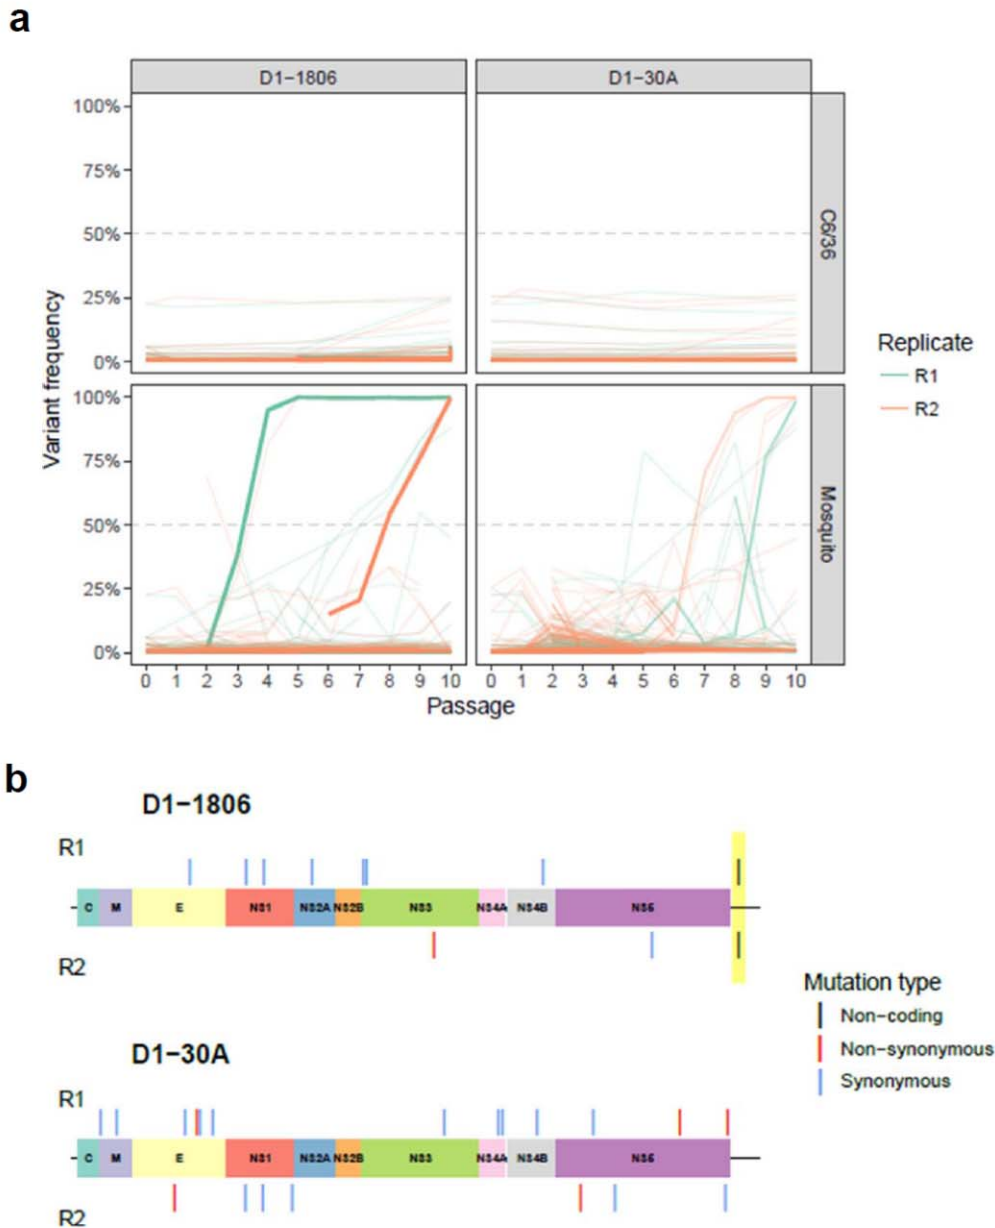

789

790

791 **Figure 3.** Frequency variation and genomic position of consensus level-reaching variants  
792 during passages. **a** The top panels correspond to DENV-1 passaged on C6/36 cells as controls  
793 and the bottom panels to DENV-1 passaged on *Ae. albopictus* mosquitoes. Bold lines  
794 represent the variant 10,418 in the 3'UTR. **b** Variants are represented with a colored segment  
795 according to the mutation type (non-coding: black; non-synonymous: red; synonymous: blue).  
796 The position of the only shared variant between two replicates is highlighted in yellow.

797

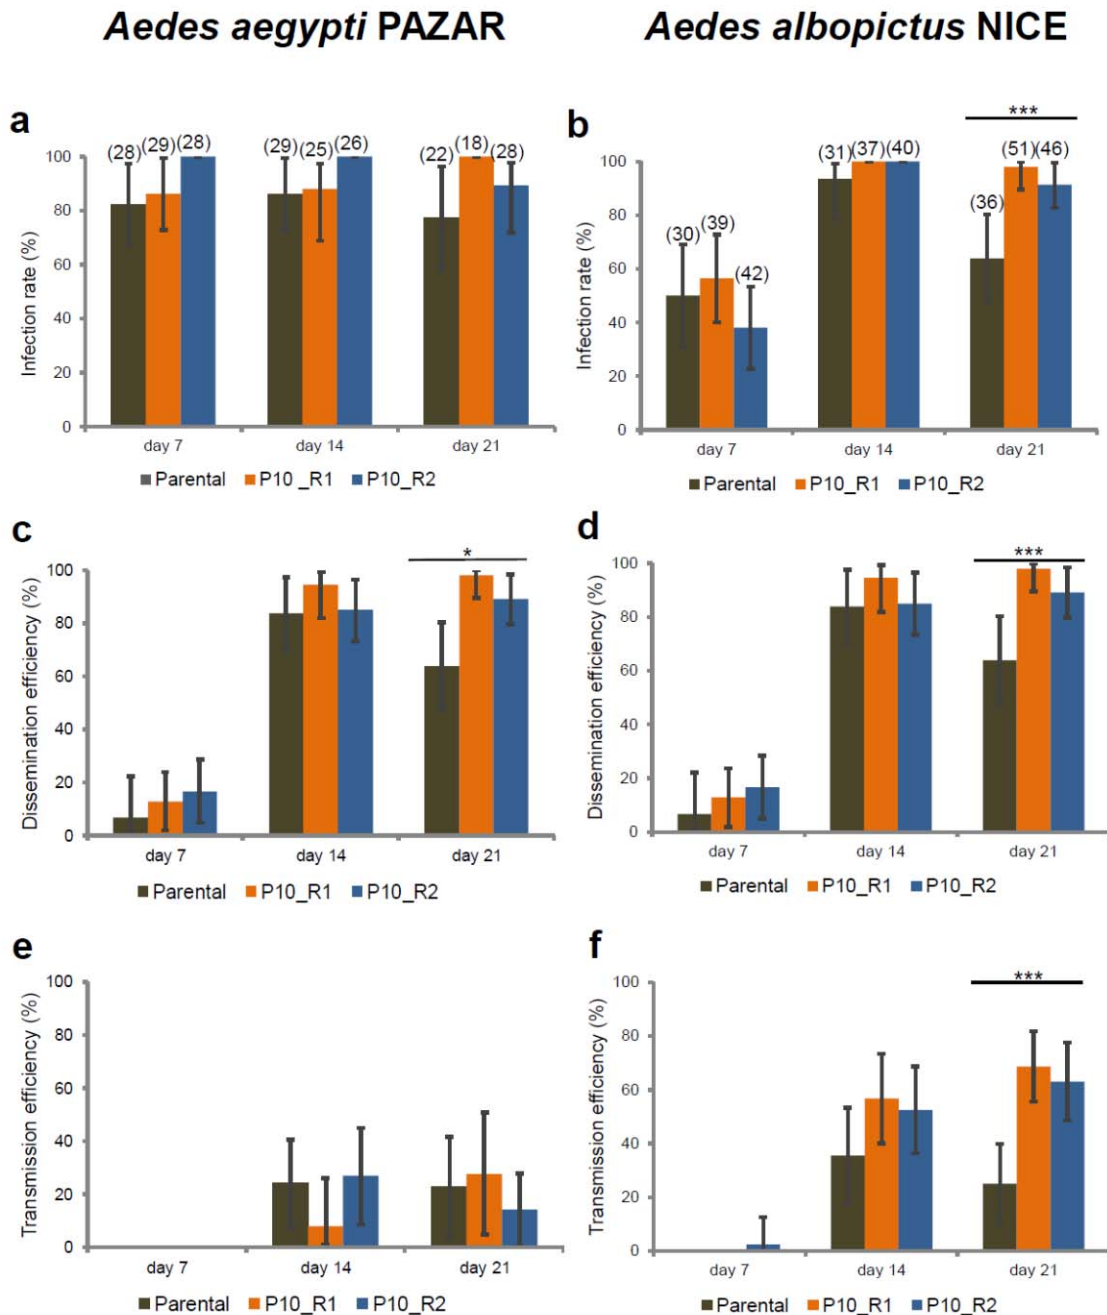

798  
799  
800  
801  
802  
803  
804  
805  
806  
807  
808  
809  
810  
811

**Figure 4.** Infection, Dissemination and Transmission of DENV-1 (Parental, P10\_R1, and P10\_R2) by *Ae. aegypti* Pazar and *Ae. albopictus* Nice. Mosquitoes were exposed to blood meals at a titer of  $10^7$  FFU/mL. Females were examined at 7, 14 and 21 dpi. Mosquito body (thorax and abdomen) and head were processed individually to determine (a, b) the infection rate (IR, proportion of mosquitoes with infected body among the engorged mosquitoes) and (c, d) the dissemination efficiency (DE, proportion of mosquitoes with infected head among tested mosquitoes). (e, f) Saliva was collected from individual females to determine the transmission efficiency (TE, proportion of mosquitoes with infectious saliva among tested mosquitoes). The Parental strain corresponds to DENV-1 1806, and P10\_R1 and P10\_R2 refer, respectively, to replicate 1 and replicate 2 of the 10<sup>th</sup> *in vivo* passages of DENV-1 1806 on *Ae. albopictus*. Asterisks refer to a significant difference (\*\*\*)  $p < 10^{-3}$ . In brackets, the number of mosquitoes tested. The error bars correspond to the confidence intervals (95%).

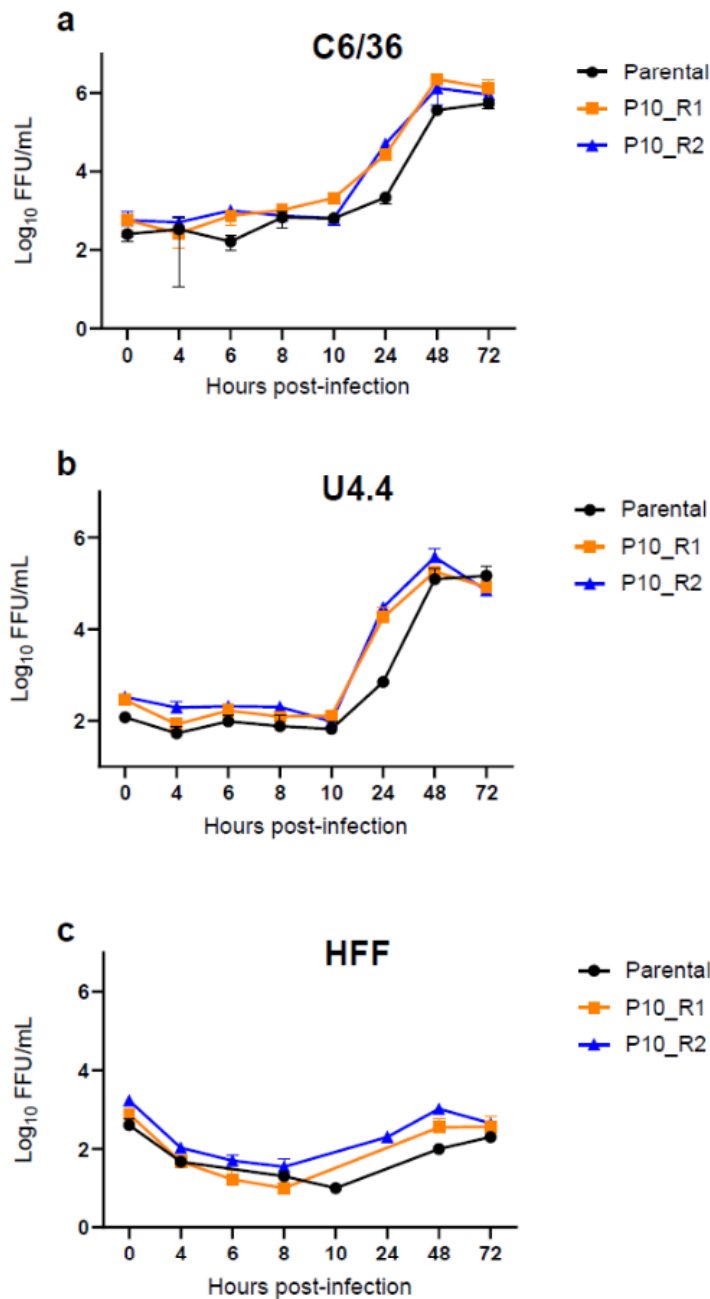

812

813

814 **Figure 5.** Growth curves of the two passages 10 of DENV-1 1806 strain in two cell lines, (a)  
815 *Ae. albopictus* C6/36 cells, (b) *Ae. albopictus* U4.4 cells, and (c) human foreskin fibroblasts  
816 HFF cells. Cells were infected with the parental strain and the two replicates of the 10<sup>th</sup>  
817 passages of DENV-1 1806 (P10\_R1 and P10\_R2) at a MOI of 0.1. Supernatants were  
818 collected at 4, 6, 8, 10, 24, 48 and 72 hrs post-inoculation. The number of infectious viral  
819 particles was determined by focus fluorescent assay on *Ae. albopictus* C6/36 cells. Three  
820 replicates were performed for each cell-virus pairing. Error bars show standard deviations.

821



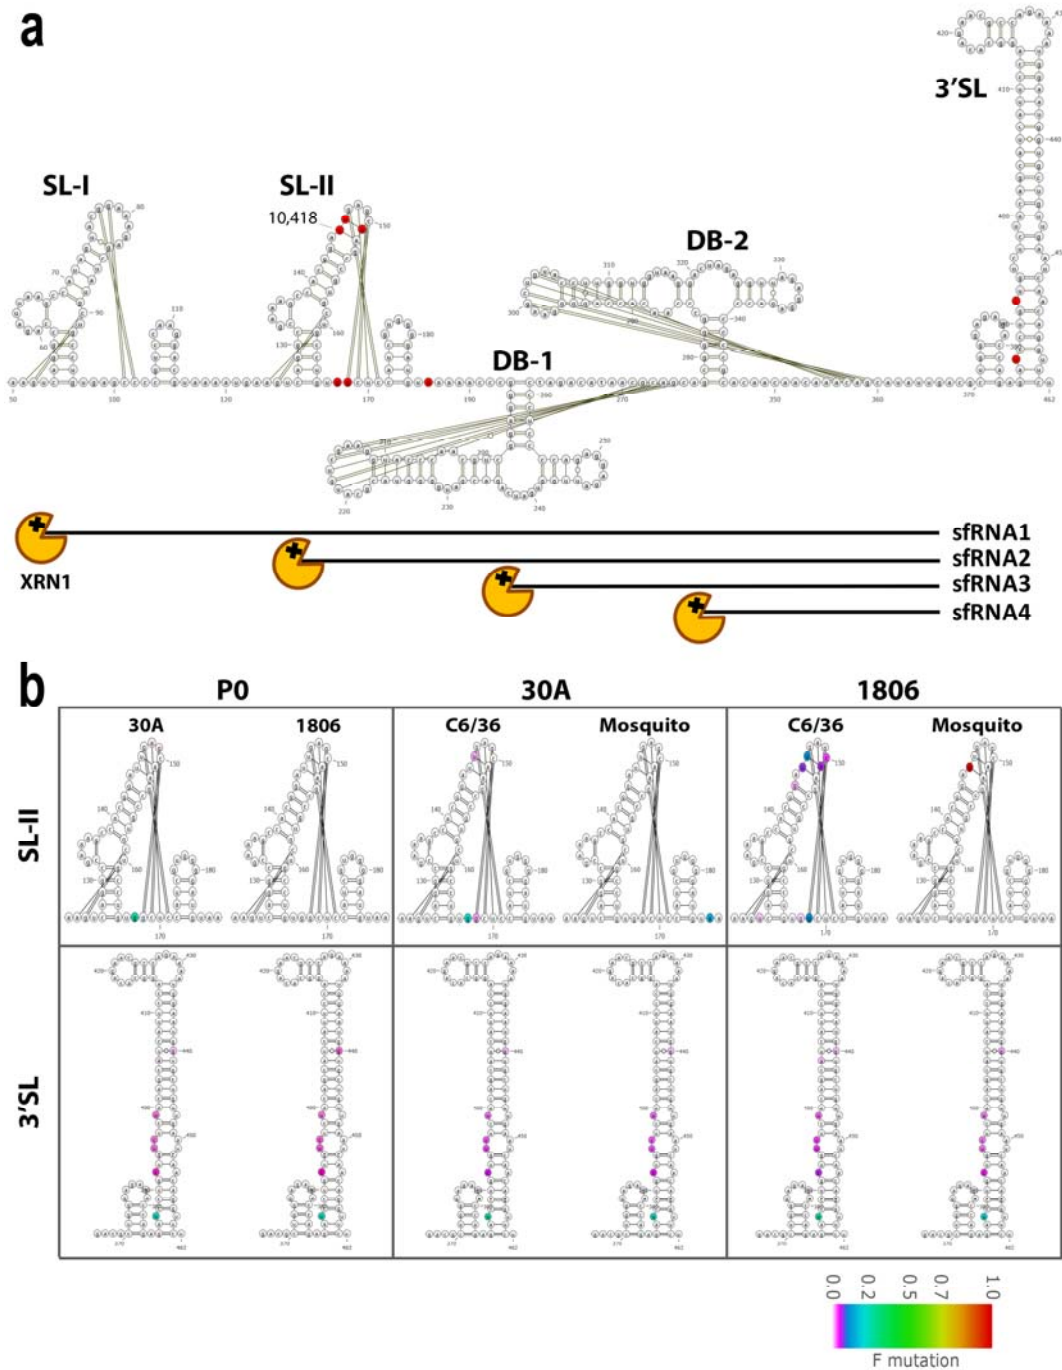

822

823

824 **Figure 6.** Analysis of mutation frequencies in the DENV-1 3'UTR. **a** Schematic overview of  
 825 the DENV-1 3'UTR secondary RNA structure, indicating from 5' to 3' the stem loop (SL)-I,  
 826 SL-II, dumbbell (DB)-1, DB-2 and 3'SL RNA structures. Single nucleotide variants with a  
 827 frequency  $\geq 0.05$  after 10 passages of DENV-1 1806 or 30A in either C6/36 or mosquitoes are  
 828 highlighted in red. Pseudoknots and other tertiary RNA interactions are indicated by the black  
 829 lines. **b** Analysis of the mutation frequencies in SL-II and the 3'SL of the parental DENV-1  
 830 30A and 1806 sequences, and passages P10 (1806) and P10 (30A). The mutation frequency is  
 831 indicated by color on a scale from 0 (white) to 1 (red).  
 832

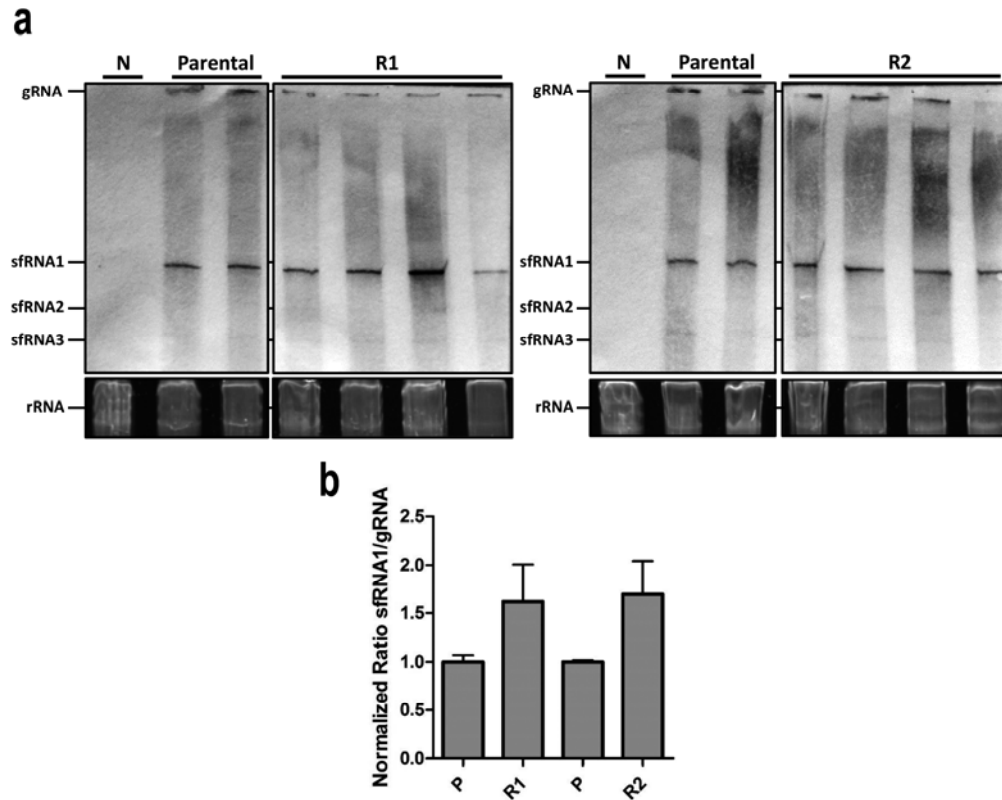

833

834

835 **Figure 7.** Northern blot detection of sfRNA production after C6/36 cells infection with  
836 DENV-1 1806. **a** Visualization of sfRNA. 5 $\mu$ g of total RNA from the parental and the two  
837 replicates P10\_R1 and P10\_R2 of DENV-1 1806 or non-infected cells (N) was size separated  
838 on a 6% Polyacrylamide/Urea gel. One gel was run for the R1 samples (left) and one for the  
839 R2 samples (right), including the negative and parental samples on each gel. Then, RNAs  
840 were blotted onto Hybond-N paper and subjected to northern-blotting with a DENV-1 3'UTR  
841 specific probe. The bands shown correspond to the DENV genomic RNA (gRNA) and  
842 subgenomic flavivirus RNA (sfRNA). As loading control, the ribosomal RNA (rRNA) from  
843 the EtBr stained gel are shown. **b** Quantification of the ratio of sfRNA to gRNA production.  
844 Band intensities were determined using the 'Measure' function in ImageJ. The intensity of the  
845 background (lane N) was subtracted from the readings before the ratio sfRNA/gRNA was  
846 calculated by dividing the intensity of the sfRNA by the intensity of the gRNA band for each  
847 sample, and then normalized to the average ratio of the parental samples. The statistics were  
848 performed using a two-tailed unpaired t-test.

849

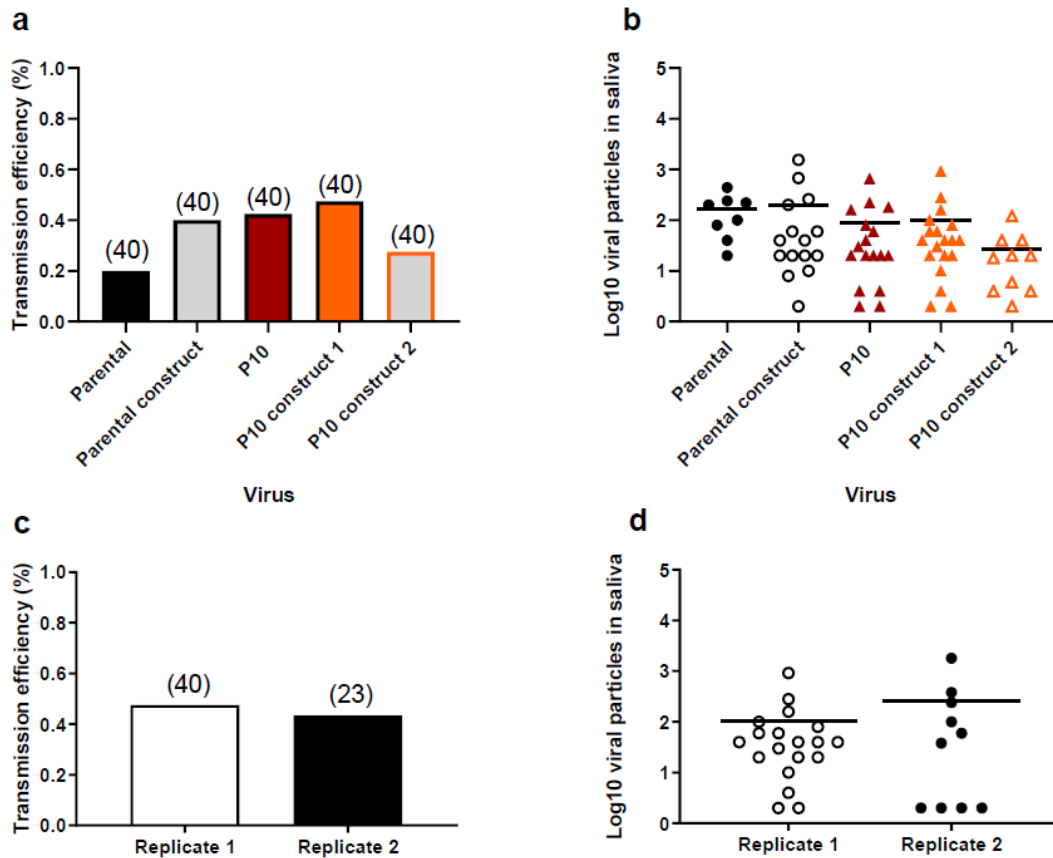

850

851

852 **Figure 8.** Reverse genetic constructs with the 10,418 mutation do not show higher  
853 transmission in *Ae. albopictus*. **a** Transmission of reverse genetic constructs (Parental  
854 construct, P10 construct 1, P10 construct 2) by *Ae. albopictus* Nice with reference to Parental  
855 and P10 strains. Twenty-one days after an infectious blood meal at a titer of  $10^7$  FFU/mL,  
856 mosquitoes were processed for saliva collection to determine the transmission efficiency (TE,  
857 proportion of mosquitoes with infectious saliva among tested mosquitoes). **b** Viral loads in  
858 saliva were estimated by focus fluorescent assay on *Ae. albopictus* C6/36 cells. **c, d** A second  
859 replicate using the P10 construct 1 was performed. Bars indicate the mean.

860

861 **Table 1.** Details on mosquito populations used for experimental infections with DENV-1.

862

| Species                 | Mosquito population | Country | Date of collection | Generation used for mosquito infections |
|-------------------------|---------------------|---------|--------------------|-----------------------------------------|
|                         | Nice                | France  | August 2011        | F3, F11                                 |
|                         | Saint-Raphaël       | France  | November 2012      | F3                                      |
| <i>Aedes albopictus</i> | Alessandria         | Italy   | November 2012      | F1                                      |
|                         | Genoa               | Italy   | October 2012       | F2                                      |
|                         | Cornella            | Spain   | July 2012          | F2                                      |
|                         | Martorell           | Spain   | July 2012          | F2                                      |
| <i>Aedes aegypti</i>    | Pazar               | Turkey  | 2016               | F4                                      |

863

864

865 **Table S1.** Comparisons of infection rates and dissemination efficiencies between mosquitoes  
866 infected with two DENV-1 strains (1806 and 30A) and examined at different days post-  
867 infection (14 and 21).  
868

| Mosquito population | Day post-infection | Fisher's exact test |                          |
|---------------------|--------------------|---------------------|--------------------------|
|                     |                    | Infection rate      | Dissemination efficiency |
| Alessandria         | 14                 | 0.093               | 0.905                    |
|                     | 21                 | 0.556               | 0.479                    |
| Genoa               | 14                 | 0.077               | 0.022                    |
|                     | 21                 | 0.035               | 0.376                    |
| Cornella            | 14                 | 0.979               | 0.168                    |
|                     | 21                 | 0.808               | 0.715                    |
| Martorell           | 14                 | 0.496               | 0.001                    |
|                     | 21                 | 0.006               | 0.002                    |
| Nice                | 14                 | 0.191               | 0.929                    |
|                     | 21                 | 0.371               | 0.463                    |
| Saint-Raphael       | 14                 | 0.18                | 0.114                    |
|                     | 21                 | 0.334               | 0.334                    |

869

870

871 **Table S2.** Comparisons of infection rates and dissemination efficiencies between the 6  
872 mosquito populations infected with a DENV-1 strain (1806 or 30A) and examined at a given  
873 day post-infection (14 or 21).  
874

| DENV-1 | Day post-infection | Fisher's exact test |                          |
|--------|--------------------|---------------------|--------------------------|
|        |                    | Infection rate      | Dissemination efficiency |
| 1806   | 14                 | 0.0001              | 0.0001                   |
|        | 21                 | 0.001               | 0.0001                   |
| 30A    | 14                 | 0.0001              | 0.0001                   |
|        | 21                 | 0.0001              | 0.0001                   |

875

876

877 **Table S3.** Comparisons of viral loads in mosquito heads between mosquitoes infected with  
878 two DENV-1 strains (1806 and 30A) and examined at different days post-infection (14 and  
879 21).  
880

| Mosquito population | Day post-infection | Wilcoxon Rank-Sum test |
|---------------------|--------------------|------------------------|
| Alessandria         | 14                 | 0.292                  |
|                     | 21                 | 0.746                  |
| Genoa               | 14                 | 0.533                  |
|                     | 21                 | 0.836                  |
| Cornella            | 14                 | 0.439                  |
|                     | 21                 | 0.018                  |
| Martorell           | 14                 | 0.073                  |
|                     | 21                 | 0.304                  |
| Nice                | 14                 | 0.183                  |
|                     | 21                 | 0.857                  |
| Saint-Raphael       | 14                 | 0.032                  |
|                     | 21                 | 0.169                  |

881

**Table S4.** Position and estimated frequency of SNVs reaching consensus level detected in the mosquito-passaged samples.

| Virus | Passage | Replicate | SNV position on DENV genome | Reference nucleotide | SNV | Sequencing depth at position | SNV frequency | Position in codon | Mutation type   |
|-------|---------|-----------|-----------------------------|----------------------|-----|------------------------------|---------------|-------------------|-----------------|
| 1806  | 2       | 2         | 5667                        | T                    | C   | 14231                        | 0.686319      | 2                 | No n-synonymous |
| 1806  | 4       | 1         | 4606                        | A                    | G   | 7484                         | 0.953234      | 3                 | Synonymous      |
| 1806  | 4       | 1         | 7360                        | T                    | C   | 5336                         | 0.962331      | 3                 | Synonymous      |
| 1806  | 4       | 1         | 10418                       | T                    | C   | 3703                         | 0.94734       | NA                | no n-coding     |
| 1806  | 4       | 2         | 9067                        | T                    | C   | 3998                         | 0.815408      | 3                 | Synonymous      |
| 1806  | 5       | 1         | 4606                        | A                    | G   | 141288                       | 0.999023      | 3                 | Synonymous      |
| 1806  | 5       | 1         | 7360                        | T                    | C   | 292005                       | 0.999017      | 3                 | Synonymous      |
| 1806  | 5       | 1         | 10418                       | T                    | C   | 199563                       | 0.998943      | NA                | no n-coding     |
| 1806  | 5       | 2         | 9067                        | T                    | C   | 94413                        | 0.998856      | 3                 | Synonymous      |
| 1806  | 6       | 1         | 4606                        | A                    | G   | 37980                        | 0.996288      | 3                 | Synonymous      |
| 1806  | 6       | 1         | 7360                        | T                    | C   | 20048                        | 0.996758      | 3                 | Synonymous      |
| 1806  | 6       | 1         | 10418                       | T                    | C   | 18264                        | 0.996605      | NA                | no n-coding     |
| 1806  | 6       | 2         | 9067                        | T                    | C   | 21252                        | 0.996518      | 3                 | Synonymous      |
| 1806  | 7       | 1         | 3757                        | C                    | T   | 16059                        | 0.55869       | 3                 | Synonymous      |
| 1806  | 7       | 1         | 4606                        | A                    | G   | 24880                        | 0.996383      | 3                 | Synonymous      |
| 1806  | 7       | 1         | 7360                        | T                    | C   | 15019                        | 0.997004      | 3                 | Synonymous      |
| 1806  | 7       | 1         | 10418                       | T                    | C   | 9195                         | 0.996194      | NA                | no n-coding     |
| 1806  | 7       | 2         | 9067                        | T                    | C   | 5095                         | 0.995682      | 3                 | Synonymous      |
| 1806  | 8       | 1         | 2719                        | A                    | G   | 7900                         | 0.553544      | 3                 | Synonymous      |
| 1806  | 8       | 1         | 3001                        | C                    | T   | 8388                         | 0.510968      | 3                 | Synonymous      |
| 1806  | 8       | 1         | 3757                        | C                    | T   | 9649                         | 0.643694      | 3                 | Synonymous      |
| 1806  | 8       | 1         | 4552                        | G                    | A   | 10485                        | 0.623176      | 3                 | Synonymous      |
| 1806  | 8       | 1         | 4606                        | A                    | G   | 11782                        | 0.996605      | 3                 | Synonymous      |
| 1806  | 8       | 1         | 7360                        | T                    | C   | 10285                        | 0.996889      | 3                 | Synonymous      |
| 1806  | 8       | 1         | 10418                       | T                    | C   | 6829                         | 0.997218      | NA                | no n-coding     |
| 1806  | 8       | 2         | 9067                        | T                    | C   | 4272                         | 0.994616      | 3                 | Synonymous      |
| 1806  | 8       | 2         | 10418                       | T                    | C   | 3477                         | 0.540696      | NA                | no n-coding     |
| 1806  | 9       | 1         | 1840                        | C                    | T   | 16264                        | 0.545315      | 3                 | Synonymous      |
| 1806  | 9       | 1         | 2719                        | A                    | G   | 14188                        | 0.790668      | 3                 | Synonymous      |
| 1806  | 9       | 1         | 3001                        | C                    | T   | 12951                        | 0.792448      | 3                 | Synonymous      |
| 1806  | 9       | 1         | 3757                        | C                    | T   | 15968                        | 0.830348      | 3                 | Synonymous      |
| 1806  | 9       | 1         | 4552                        | G                    | A   | 15493                        | 0.828632      | 3                 | Synonymous      |
| 1806  | 9       | 1         | 4606                        | A                    | G   | 17632                        | 0.996257      | 3                 | Synonymous      |
| 1806  | 9       | 1         | 7360                        | T                    | C   | 15973                        | 0.997308      | 3                 | Synonymous      |
| 1806  | 9       | 1         | 10418                       | T                    | C   | 10027                        | 0.995412      | NA                | no n-coding     |
| 1806  | 9       | 2         | 9067                        | T                    | C   | 6528                         | 0.996477      | 3                 | Synonymous      |
| 1806  | 9       | 2         | 10418                       | T                    | C   | 5922                         | 0.761905      | NA                | no n-coding     |
| 1806  | 10      | 1         | 2719                        | A                    | G   | 84568                        | 0.877956      | 3                 | Synonymous      |
| 1806  | 10      | 1         | 3001                        | C                    | T   | 72183                        | 0.972334      | 3                 | Synonymous      |
| 1806  | 10      | 1         | 3757                        | C                    | T   | 92700                        | 0.975955      | 3                 | Synonymous      |
| 1806  | 10      | 1         | 4552                        | G                    | A   | 101912                       | 0.974851      | 3                 | Synonymous      |
| 1806  | 10      | 1         | 4606                        | A                    | G   | 101144                       | 0.9991        | 3                 | Synonymous      |
| 1806  | 10      | 1         | 7360                        | T                    | C   | 213796                       | 0.998948      | 3                 | Synonymous      |
| 1806  | 10      | 1         | 10418                       | T                    | C   | 141416                       | 0.998883      | NA                | no n-coding     |
| 1806  | 10      | 2         | 9067                        | T                    | C   | 29741                        | 0.998352      | 3                 | Synonymous      |
| 1806  | 10      | 2         | 10418                       | T                    | C   | 37209                        | 0.995996      | NA                | no n-coding     |
| 30A   | 5       | 1         | 1768                        | T                    | A   | 312358                       | 0.787503      | 3                 | Synonymous      |
| 30A   | 6       | 1         | 1768                        | T                    | A   | 1264                         | 0.665348      | 3                 | Synonymous      |
| 30A   | 7       | 1         | 1768                        | T                    | A   | 8290                         | 0.563209      | 3                 | Synonymous      |
| 30A   | 7       | 2         | 1611                        | C                    | T   | 8758                         | 0.704042      | 2                 | No n-synonymous |
| 30A   | 7       | 2         | 2977                        | T                    | C   | 9778                         | 0.710268      | 3                 | Synonymous      |
| 30A   | 7       | 2         | 3442                        | G                    | A   | 5856                         | 0.691257      | 3                 | Synonymous      |
| 30A   | 7       | 2         | 10208                       | C                    | T   | 5068                         | 0.608327      | 1                 | Synonymous      |
| 30A   | 8       | 1         | 448                         | T                    | C   | 1075                         | 0.6           | 3                 | Synonymous      |
| 30A   | 8       | 1         | 1768                        | T                    | A   | 2389                         | 0.821683      | 3                 | Synonymous      |
| 30A   | 8       | 1         | 1959                        | A                    | G   | 2247                         | 0.604806      | 2                 | No n-synonymous |
| 30A   | 8       | 1         | 5822                        | C                    | T   | 1181                         | 0.519898      | 1                 | Synonymous      |
| 30A   | 8       | 1         | 8149                        | T                    | C   | 1248                         | 0.615385      | 3                 | Synonymous      |
| 30A   | 8       | 1         | 10258                       | A                    | T   | 1017                         | 0.612586      | 3                 | No n-synonymous |
| 30A   | 8       | 2         | 1611                        | C                    | T   | 5281                         | 0.937512      | 2                 | No n-synonymous |
| 30A   | 8       | 2         | 2977                        | T                    | C   | 5192                         | 0.943374      | 3                 | Synonymous      |
| 30A   | 8       | 2         | 3442                        | G                    | A   | 3062                         | 0.931417      | 3                 | Synonymous      |
| 30A   | 8       | 2         | 10208                       | C                    | T   | 1783                         | 0.902973      | 1                 | Synonymous      |
| 30A   | 9       | 1         | 694                         | C                    | T   | 1501                         | 0.774151      | 3                 | Synonymous      |
| 30A   | 9       | 1         | 2002                        | C                    | T   | 2058                         | 0.757532      | 3                 | Synonymous      |
| 30A   | 9       | 1         | 6658                        | G                    | A   | 1778                         | 0.72216       | 3                 | Synonymous      |
| 30A   | 9       | 1         | 6728                        | C                    | T   | 2246                         | 0.769813      | 1                 | Synonymous      |
| 30A   | 9       | 1         | 7267                        | C                    | T   | 978                          | 0.747444      | 3                 | Synonymous      |
| 30A   | 9       | 1         | 9504                        | A                    | G   | 1527                         | 0.762279      | 2                 | No n-synonymous |
| 30A   | 9       | 2         | 1611                        | C                    | T   | 11211                        | 0.997681      | 2                 | No n-synonymous |
| 30A   | 9       | 2         | 2716                        | A                    | G   | 5452                         | 0.762656      | 3                 | Synonymous      |
| 30A   | 9       | 2         | 2977                        | T                    | C   | 11160                        | 0.996416      | 3                 | Synonymous      |
| 30A   | 9       | 2         | 3442                        | G                    | A   | 7394                         | 0.994725      | 3                 | Synonymous      |
| 30A   | 9       | 2         | 7952                        | T                    | C   | 11955                        | 0.931409      | 1                 | No n-synonymous |
| 30A   | 9       | 2         | 8485                        | T                    | C   | 13405                        | 0.898396      | 3                 | Synonymous      |
| 30A   | 9       | 2         | 10208                       | C                    | T   | 5542                         | 0.997835      | 1                 | Synonymous      |
| 30A   | 10      | 1         | 694                         | C                    | T   | 19924                        | 0.984039      | 3                 | Synonymous      |
| 30A   | 10      | 1         | 2002                        | C                    | T   | 35756                        | 0.984758      | 3                 | Synonymous      |
| 30A   | 10      | 1         | 2200                        | T                    | C   | 20712                        | 0.876014      | 3                 | Synonymous      |
| 30A   | 10      | 1         | 6658                        | G                    | A   | 18057                        | 0.976574      | 3                 | Synonymous      |
| 30A   | 10      | 1         | 6728                        | C                    | T   | 23549                        | 0.982717      | 1                 | Synonymous      |
| 30A   | 10      | 1         | 7267                        | C                    | T   | 17245                        | 0.985503      | 3                 | Synonymous      |
| 30A   | 10      | 1         | 9504                        | A                    | G   | 22552                        | 0.982973      | 2                 | No n-synonymous |
| 30A   | 10      | 2         | 1611                        | C                    | T   | 18775                        | 0.998189      | 2                 | No n-synonymous |
| 30A   | 10      | 2         | 2716                        | A                    | G   | 13145                        | 0.909623      | 3                 | Synonymous      |
| 30A   | 10      | 2         | 2977                        | T                    | C   | 13526                        | 0.998743      | 3                 | Synonymous      |
| 30A   | 10      | 2         | 3442                        | G                    | A   | 8885                         | 0.996511      | 3                 | Synonymous      |
| 30A   | 10      | 2         | 7952                        | T                    | C   | 10940                        | 0.999177      | 1                 | No n-synonymous |
| 30A   | 10      | 2         | 8485                        | T                    | C   | 7629                         | 0.994626      | 3                 | Synonymous      |
| 30A   | 10      | 2         | 10208                       | C                    | T   | 13546                        | 0.99904       | 1                 | Synonymous      |



**Table S5.** Sequences of the three reverse genetic constructs (Parental, P10 construct 1, P10 construct 2) using the deep sequencing method described in materials and methods. Only substitutions with a mutation frequency > 5% were considered significant for further analysis. The parental strain P0 was used as the reference sequence. The two P10 constructs presented the mutation 10,418 (in grey) at a frequency close to 100% beside other mutations.

| Clone       | Mutation | Position | Frequency (%) | AA Position | AA change  | Gene   |
|-------------|----------|----------|---------------|-------------|------------|--------|
| Parental IC | A->G     | 211      | 27.2          | 39          | Ser        | Capsid |
|             | T->C     | 4697     | 25.9          | 60          | Tyr -> His | nsp3   |
|             | C->T     | 8650     | 30            | 359         | Asp        | nsp5   |
|             | T->C     | 9172     | 6.3           | 533         | Asp        | nsp5   |
| P10 IC1     | T->C     | 1513     | 5             | 193         | Phe        | Env    |
|             | G->T     | 2684     | 5.4           | 89          | Val -> Phe | nsp1   |
|             | T->C     | 3472     | 5.3           | 351         | Ser        | nsp1   |
|             | A->T     | 3581     | 5.6           | 36          | Thr -> Ser | nsp2a  |
|             | T->C     | 5173     | 52.5          | 218         | Arg        | nsp3   |
|             | G->A     | 5764     | 5.8           | 415         | Gly        | nsp3   |
|             | C->A     | 6346     | 5.5           | 609         | Arg        | nsp3   |
|             | A->G     | 7210     | 33.1          | 128         | Ala        | nsp4b  |
| T->C        | 10418    | 100      |               |             |            |        |
| P10 IC2     | T->C     | 7321     | 98.8          | 165         | Phe        | nsp4b  |
|             | G->A     | 9571     | 98.4          | 666         | Val        | nsp5   |
|             | T->C     | 10418    | 99.9          |             |            |        |

**Table S6.** Primers used to generate subgenomic DNA fragments (ISA procedure)

|                             |                                                       |                                                               |
|-----------------------------|-------------------------------------------------------|---------------------------------------------------------------|
| <b>pCMV_F</b>               | TCAATATTGGCCATTAGCCATATTAT                            | pCMV tagged                                                   |
| <b>pCMV_tag_R</b>           | GTTCTTGTCGGTCCACGTAGACTAACAACCTCGGTTCACTAAACGAGCTCTGC |                                                               |
| <b>1806_I_tag_F</b>         | CTATATAAGCAGAGCTCGTTTAGTGAACCGAGTTGTTAGTCTACGTGGACCGA | Fragment I tagged                                             |
| <b>1806_I_R</b>             | CTGACCCTGCAGAGACCATTGA                                |                                                               |
| <b>1806_II_F</b>            | CCACAACAGTCACAGGAAAGATA                               | Fragment II                                                   |
| <b>1806_II_R</b>            | CTCCACGTCCATGTTCTCCTC                                 |                                                               |
| <b>1806_III_F</b>           | CAGCAATAGACGGGGAGTACAG                                | Fragment III<br>WT                                            |
| <b>1806_III_WT_R</b>        | CTCAATCCGTGGCTTTCGGC                                  |                                                               |
| <b>1806_III_F</b>           | CAGCAATAGACGGGGAGTACAG                                | Fragment III<br>Mut                                           |
| <b>1806_III_Mut_R</b>       | CTCAGTCCGTGGCTTTCGGC                                  |                                                               |
| <b><u>3UTRHDRSV40 F</u></b> | GTGAGCCCCGTCCAAGGACGT                                 | <u>367 nts of<br/>3'UTR ±<br/>HDR/SV40pA<br/>(WT and Mut)</u> |
| <b><u>3UTRHDRSV40 R</u></b> | CTCAGGGTCAATGCCAGCGCT                                 |                                                               |

**Figure S1. Viral titers of cell culture supernatants used to run passages in the experimental selection for DENV-1 adaptation to *Ae. albopictus*.** Saliva were collected from 15-25 mosquitoes 19-21 days after infection and pooled to inoculate a monolayer of C6/36 *Ae. albopictus* cells. After 8 days at 28°C, cell culture supernatants were collected and provided to mosquitoes to run the next passage. Ten passages were performed. The supernatants were titrated by focus fluorescent assay on *Ae. albopictus* C6/36 cells. Viral titer was expressed in FFU/mL. Two biological replicates were performed for each viral strain, DENV-1 30A and DENV-1 1806.

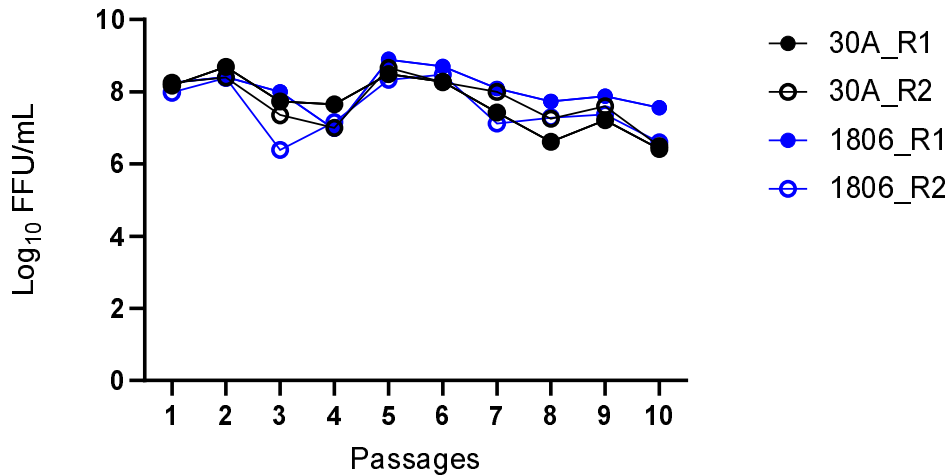

**Figure S2.** Sequencing coverage and depth by sample.

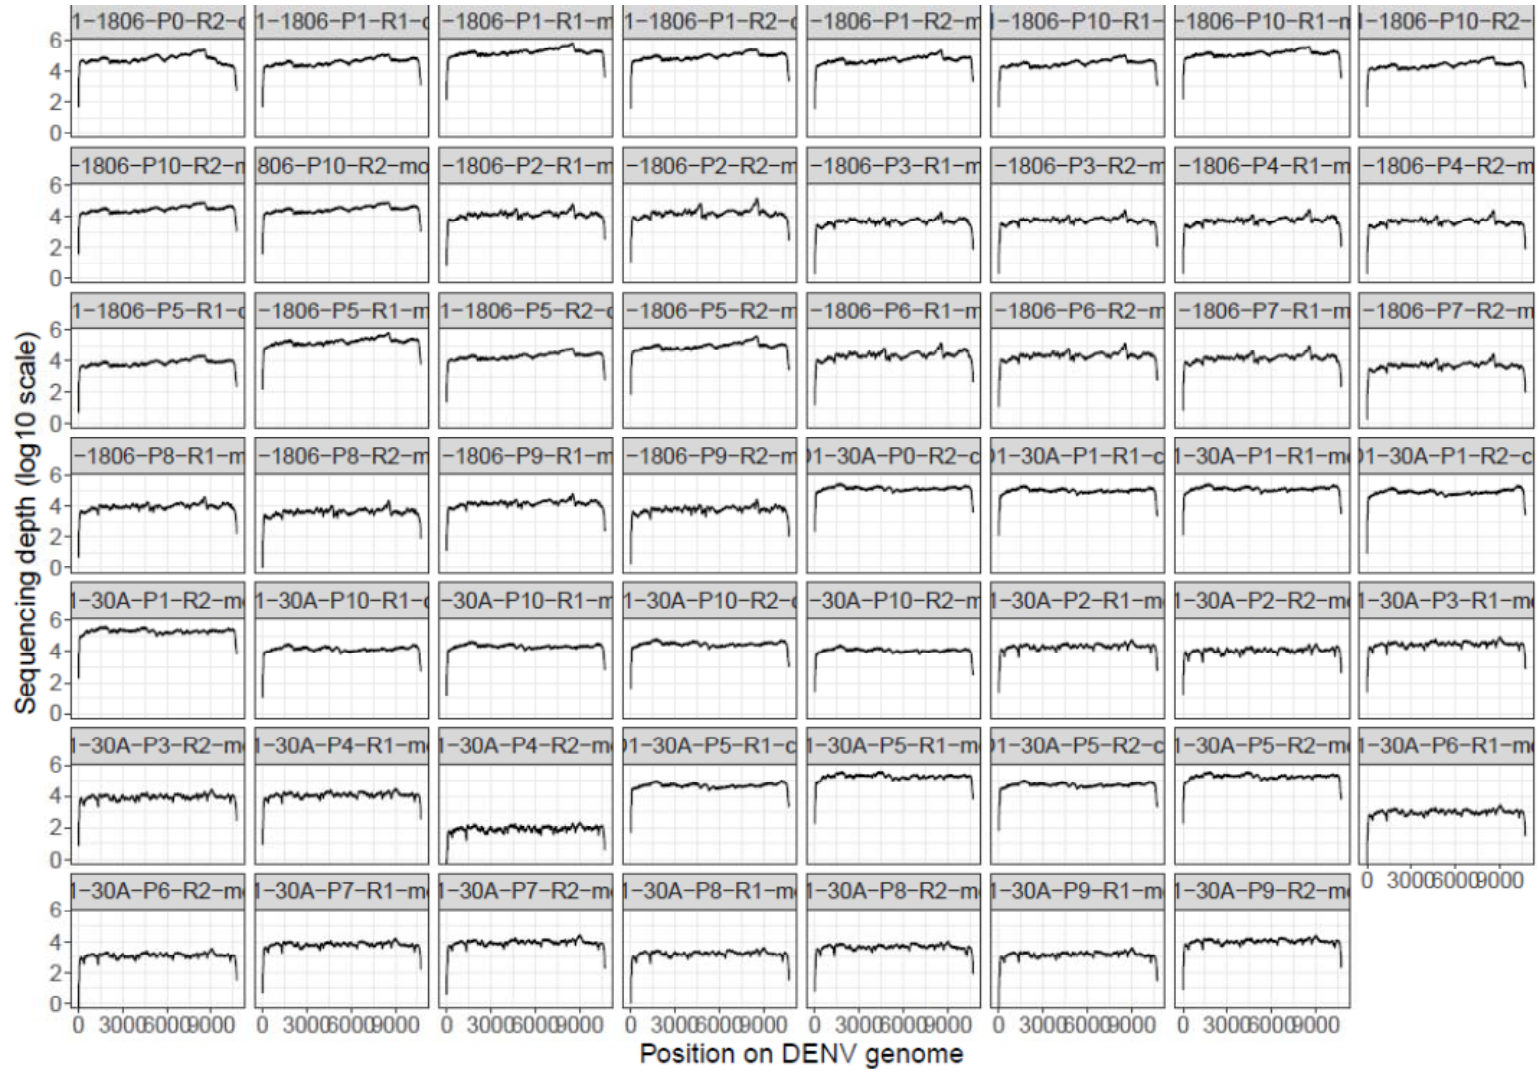

**Supplemental Text.** Sequences of the *de novo* subgenomic DNA fragments used during the ISA procedure

pCMV

GAATAAGGGCGACACGGAAATGTCACCCAACCTGATCTTCAGCATCTTCAATATTGGCCATTAGCCAT  
ATTATTCATTGGTTATATAGCATAAATCAATATTGGCTATTGGCCATTGCATACGTTGTATCTATATCA  
TAATATGTACATTTATATTGGCTCATGTCCAATATGACCGCCATGTTGGCATTGATTATTGACTAGTTA  
TTAATAGTAATCAATTACGGGGTCATTAGTTCATAGCCCATATATGGAGTTCGCGTTACATAACTTA  
CGGTAATGGCCCGCTGGCTGACCGCCCAACGACCCCGCCATTGACGTCAATAATGACGTATGTT  
CCCATAGTAACGCCAATAGGGACTTTCCATTGACGTCAATGGGTGGAGTATTTACGGTAAACTGCCCA  
CTTGGCAGTACATCAAGTGTATCATATGCCAAGTCCGCCCCCTATTGACGTCAATGACGGTAAATGGC  
CCGCCTGGCATTATGCCCAGTACATGACCTTACGGGACTTTCTACTTGGCAGTACATCTACGTATTA  
GTCATCGCTATTACCATGGTGATGCGGTTTTGGCAGTACACCAATGGGCGTGGATAGCGGTTTGACTC  
ACGGGGATTTCCAAGTCTCCACCCCATTTGACGTCAATGGGAGTTTGTGTTTGGCACCAAAATCAACGGG  
ACTTTCCAAAATGTCGTAATAACCCCGCCCCGTTGACGCAAATGGGCGGTAGGCGTGTACGGTGGGA  
GGTCTATATAAGCAGAGCTCGTTTAGTGAACCG

367 last nucleotides of 3'UTR + HDR/SV40pA (WT; T)

GTGAGCCCCGTCCAAGGACGTAAAATGAAGTCAGGCCGAAAGCCACGGATTGAGCAAGCCGTGCTG  
CCTGTGGCTCCATCGTGGGGATGTAAAAACCCGGGAGGCTGCAACCCATGGAAGCTGTACGCATGGG  
GTAGCAGACTAGTGGTTAGAGGAGACCCCTCCCTAGACATAACGCAGCAGCGGGGCCCAACACCAG  
GGGAAGCTGTACCTTGGTGGTAAGGACTAGAGGTTAGAGGAGACCCCGCACACAACAACAGC  
ATATTGACGCTGGGAGAGACCAGAGATCCTGCTGTCTCTACAGCATCATTCCAGGCACAGAACGCCA  
GAAAATGGAATGGTGCTGTTGAATCAACAGGTTCTGGCCGGCATGGTCCCAGCCTCCTCGCTGGCGC  
CGGCTGGGCAACATTCCGAGGGGACCGTCCCCTCGGTAATGGCGAATGGGACTCGCGACAGACATGA  
TAAGATACATTGATGAGTTTGGACAAACCACAACACTAGAATGCAGTGAAAAAATGCTTTATTTGTGA  
AATTAAGCGCTGGCATTGACCCTGAGGTTTACCCTCACAAACGTTCCAGT

367 last nucleotides of 3'UTR + HDR/SV40pA (Mutant; C)

GTGAGCCCCGTCCAAGGACGTAAAATGAAGTCAGGCCGAAAGCCACGGACTGAGCAAGCCGTGCTG  
CCTGTGGCTCCATCGTGGGGATGTAAAAACCCGGGAGGCTGCAACCCATGGAAGCTGTACGCATGGG  
GTAGCAGACTAGTGGTTAGAGGAGACCCCTCCCTAGACATAACGCAGCAGCGGGGCCCAACACCAG  
GGGAAGCTGTACCTTGGTGGTAAGGACTAGAGGTTAGAGGAGACCCCGCACACAACAACAGC  
ATATTGACGCTGGGAGAGACCAGAGATCCTGCTGTCTCTACAGCATCATTCCAGGCACAGAACGCCA  
GAAAATGGAATGGTGCTGTTGAATCAACAGGTTCTGGCCGGCATGGTCCCAGCCTCCTCGCTGGCGC  
CGGCTGGGCAACATTCCGAGGGGACCGTCCCCTCGGTAATGGCGAATGGGACTCGCGACAGACATGA  
TAAGATACATTGATGAGTTTGGACAAACCACAACACTAGAATGCAGTGAAAAAATGCTTTATTTGTGA  
AATTAAGCGCTGGCATTGACCCTGAGGTTTACCCTCACAAACGTTCCAGT
